# Supplementary material for: Sirtuin 1-activating derivatives belonging to the anilinopyridine class displaying in vivo cardioprotective activities
Source: Royal Society of Chemistry journal article supplement (doi:10.1039/d3md00489a), 2023-12-05
Supplement: d3md00489a1.pdf [file d3md00489a1.pdf]

# Supporting Information

## Sirtuin 1-activating derivatives belonging to the anilinopyridine class displaying *in vivo* cardioprotective activities

Giulia Bononi <sup>1,†</sup>, Valentina Citi <sup>1,†</sup>, Alma Martelli <sup>1,2</sup>, Giulio Poli <sup>1</sup>, Tiziano Tuccinardi <sup>1,2</sup>, Carlotta Granchi <sup>1,2,\*</sup>, Lara Testai <sup>1,2,\*</sup>, Vincenzo Calderone <sup>1,2</sup> and Filippo Minutolo <sup>1,2</sup>

<sup>1</sup> Department of Pharmacy, University of Pisa, Via Bonanno 6, 56126 Pisa, Italy;

giulia.bononi@farm.unipi.it (G.B.); valentina.citi@unipi.it (V.C.); alma.martelli@unipi.it (A.M.); giulio.poli@unipi.it (G.P.), tiziano.tuccinardi@unipi.it (T.T), vincenzo.calderone@unipi.it (V.C.); filippo.minutolo@unipi.it (F.M)

<sup>2</sup> Center for Instrument Sharing of the University of Pisa (CISUP), Lungarno Pacinotti 43, 56126 Pisa, Italy.

\* Correspondence: carlotta.granchi@unipi.it (C.G.); lara.testai@unipi.it (L.T.)

† These authors equally contributed to this work.

### Table of Contents

|                                                                                               |         |
|-----------------------------------------------------------------------------------------------|---------|
| <b>Figure S1-S16.</b> RP-HPLC traces of the final compounds.                                  | S2-S17  |
| <b>Figure S17-S32.</b> <sup>1</sup> H and <sup>13</sup> C NMR spectra of the final compounds. | S18-S33 |
| <b>Figure S33-S48.</b> ESI-HRMS spectra of the final compounds.                               | S34-S41 |
| <b>Figure S49.</b> Different binding subpockets of SIRT1 catalytic site                       | S42     |

# ==== Shimadzu LabSolutions Analysis Report ====

Sample Name : SIRT14\_500uM  
 Sample ID : SIRT14\_500uM  
 Data Filename : SIRT14\_500uM\_p\_2.lcd  
 Method Filename : MAGL254.lcm

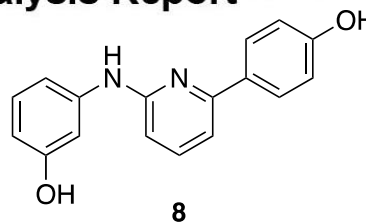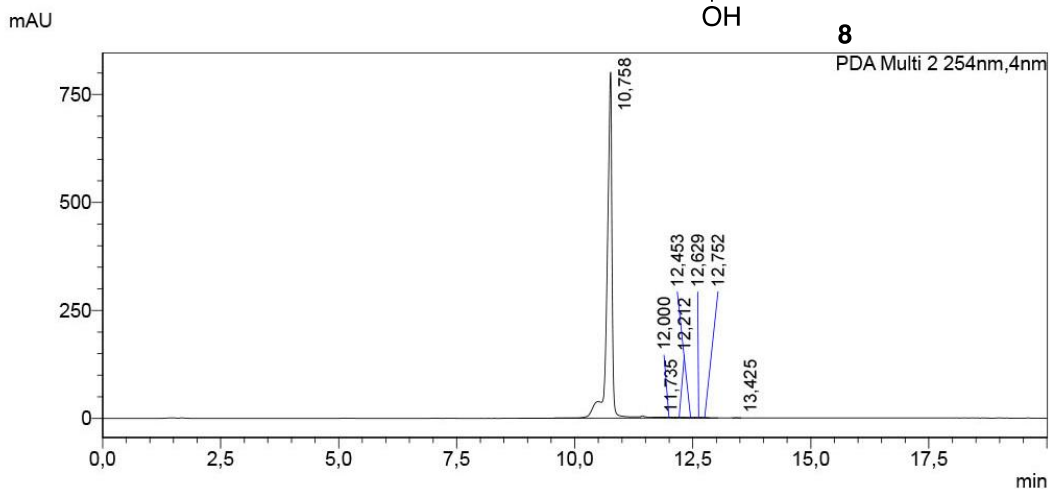

PDA Ch2 254nm

| Peak# | Ret. Time | Area    | Area%   | Height |
|-------|-----------|---------|---------|--------|
| 1     | 10,758    | 5905551 | 99,625  | 798902 |
| 2     | 11,735    | 3750    | 0,063   | 699    |
| 3     | 12,000    | 7808    | 0,132   | 1064   |
| 4     | 12,212    | 4102    | 0,069   | 673    |
| 5     | 12,453    | 1302    | 0,022   | 322    |
| 6     | 12,629    | 1250    | 0,021   | 280    |
| 7     | 12,752    | 2490    | 0,042   | 635    |
| 8     | 13,425    | 1504    | 0,025   | 359    |
| Total |           | 5927757 | 100,000 | 802935 |

**Figure S1.** HPLC chromatogram of compound **8**.

# ==== Shimadzu LabSolutions Analysis Report ====

Sample Name : SIRT17\_500uM  
 Sample ID : SIRT17\_500uM  
 Data Filename : SIRT17\_500uM\_p.lcd  
 Method Filename : MAGL254.lcm

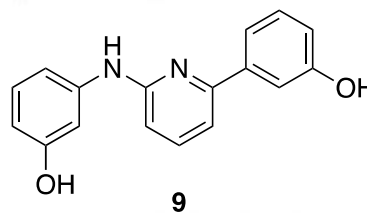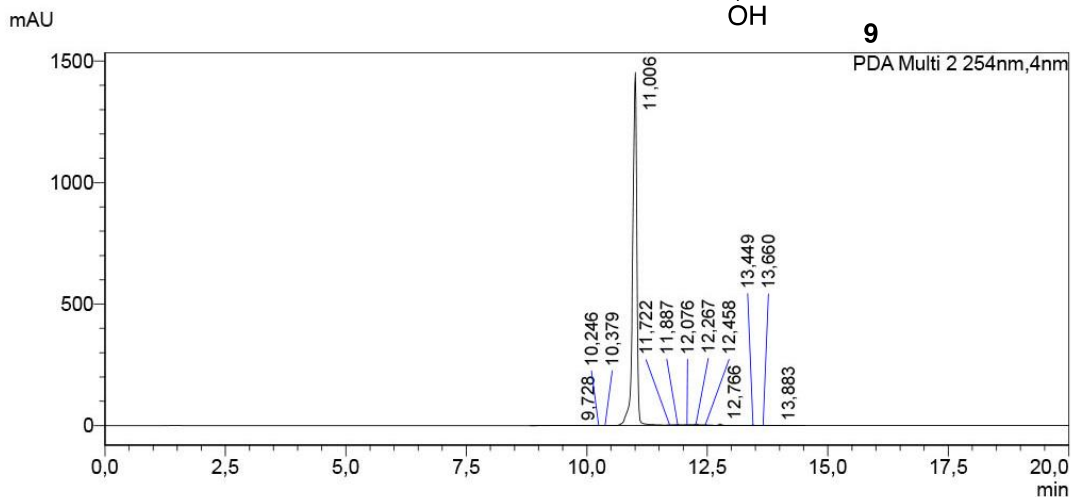

PDA Ch2 254nm

| Peak# | Ret. Time | Area    | Area%   | Height  |
|-------|-----------|---------|---------|---------|
| 1     | 9,728     | 26244   | 0,297   | 685     |
| 2     | 10,246    | 21512   | 0,243   | 1026    |
| 3     | 10,379    | 10220   | 0,115   | 982     |
| 4     | 11,006    | 8711411 | 98,438  | 1452342 |
| 5     | 11,722    | 1024    | 0,012   | 264     |
| 6     | 11,887    | 9975    | 0,113   | 1949    |
| 7     | 12,076    | 8881    | 0,100   | 1513    |
| 8     | 12,267    | 27860   | 0,315   | 5478    |
| 9     | 12,458    | 7702    | 0,087   | 1927    |
| 10    | 12,766    | 17963   | 0,203   | 4795    |
| 11    | 13,449    | 3698    | 0,042   | 519     |
| 12    | 13,660    | 1610    | 0,018   | 360     |
| 13    | 13,883    | 1585    | 0,018   | 306     |
| Total |           | 8849685 | 100,000 | 1472146 |

**Figure S2.** HPLC chromatogram of compound **9**.

# ==== Shimadzu LabSolutions Analysis Report ====

Sample Name : SIRT15\_500uM  
 Sample ID : SIRT15\_500uM  
 Data Filename : SIRT15\_500uM\_p-corr.lcd  
 Method Filename : MAGL254.lcm

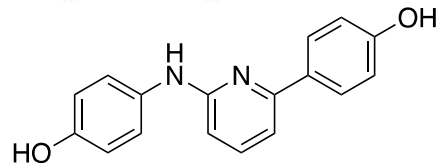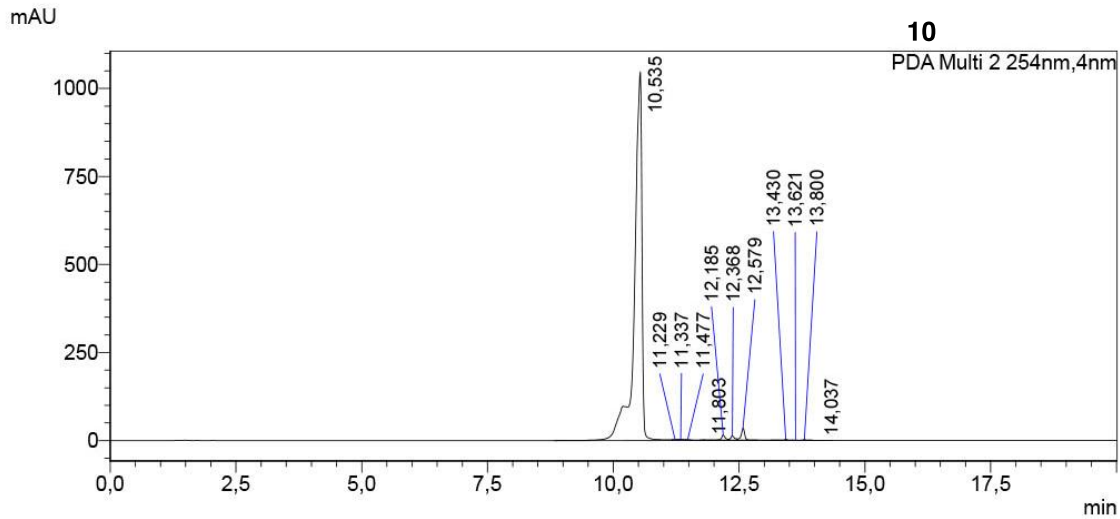

PDA Ch2 254nm

| Peak# | Ret. Time | Area     | Area%   | Height  |
|-------|-----------|----------|---------|---------|
| 1     | 10,535    | 11022579 | 96,988  | 1046996 |
| 2     | 11,229    | 1415     | 0,012   | 345     |
| 3     | 11,337    | 8518     | 0,075   | 2046    |
| 4     | 11,477    | 2101     | 0,018   | 523     |
| 5     | 11,803    | 2882     | 0,025   | 574     |
| 6     | 12,185    | 78256    | 0,689   | 14641   |
| 7     | 12,368    | 64639    | 0,569   | 11867   |
| 8     | 12,579    | 161685   | 1,423   | 34154   |
| 9     | 13,430    | 12771    | 0,112   | 2557    |
| 10    | 13,621    | 1016     | 0,009   | 177     |
| 11    | 13,800    | 7874     | 0,069   | 1743    |
| 12    | 14,037    | 1112     | 0,010   | 100     |
| Total |           | 11364848 | 100,000 | 1115723 |

**Figure S3.** HPLC chromatogram of compound **10**.

# ==== Shimadzu LabSolutions Analysis Report ====

Sample Name : SIRT16\_500uM  
 Sample ID : SIRT16\_500uM  
 Data Filename : SIRT16\_500uM\_p-corr.lcd  
 Method Filename : MAGL254.lcm

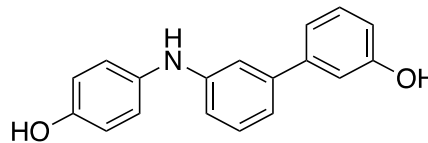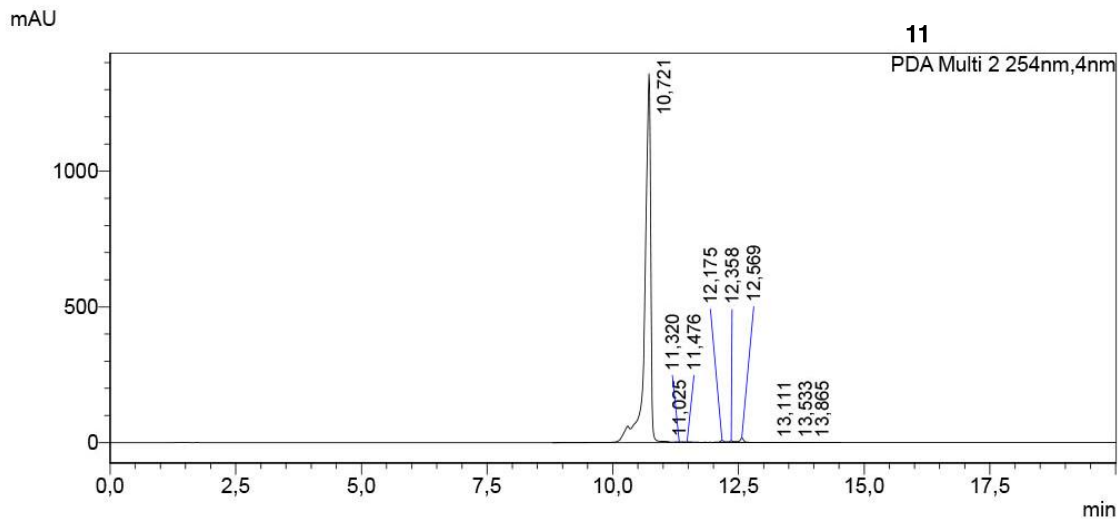

PDA Ch2 254nm

| Peak# | Ret. Time | Area     | Area%   | Height  |
|-------|-----------|----------|---------|---------|
| 1     | 10,721    | 10952112 | 98,540  | 1358082 |
| 2     | 11,025    | 4146     | 0,037   | 1157    |
| 3     | 11,320    | 1102     | 0,010   | 320     |
| 4     | 11,476    | 1731     | 0,016   | 428     |
| 5     | 12,175    | 39528    | 0,356   | 7277    |
| 6     | 12,358    | 29496    | 0,265   | 5677    |
| 7     | 12,569    | 82134    | 0,739   | 16005   |
| 8     | 13,111    | 1107     | 0,010   | 275     |
| 9     | 13,533    | 1962     | 0,018   | 234     |
| 10    | 13,865    | 1065     | 0,010   | 164     |
| Total |           | 11114382 | 100,000 | 1389619 |

**Figure S4.** HPLC chromatogram of compound **11**.

# ==== Shimadzu LabSolutions Analysis Report ====

Sample Name : SIRT20\_500uM  
 Sample ID : SIRT20\_500uM  
 Data Filename : SIRT20\_500uM\_new\_p\_corr.lcd  
 Method Filename : MAGL254 MeOH.lcm

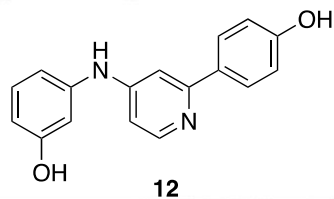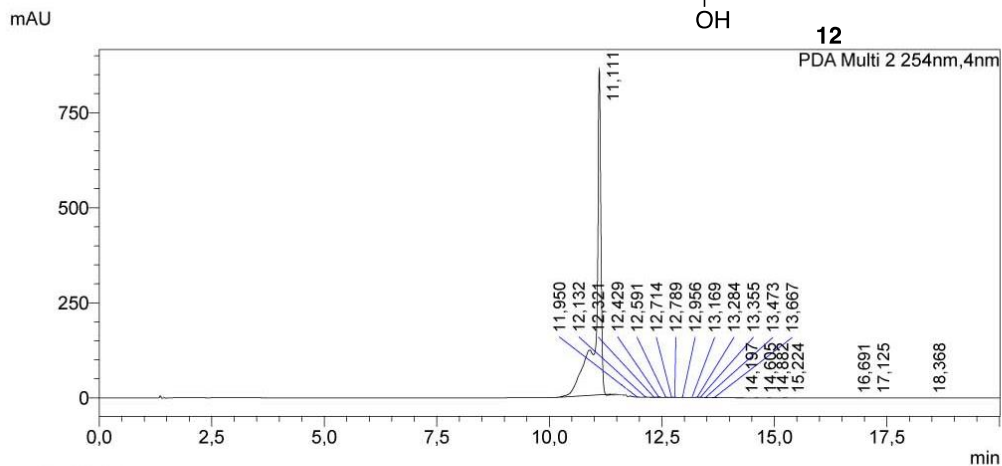

PDA Ch2 254nm

| Peak# | Ret. Time | Area    | Area%  | Height |
|-------|-----------|---------|--------|--------|
| 1     | 11,111    | 6659221 | 99,025 | 859526 |
| 2     | 11,950    | 1616    | 0,024  | 483    |
| 3     | 12,132    | 5577    | 0,083  | 1494   |
| 4     | 12,321    | 3389    | 0,050  | 656    |
| 5     | 12,429    | 7240    | 0,108  | 1536   |
| 6     | 12,591    | 3248    | 0,048  | 674    |
| 7     | 12,714    | 2597    | 0,039  | 576    |
| 8     | 12,789    | 2086    | 0,031  | 518    |
| 9     | 12,956    | 3464    | 0,052  | 648    |
| 10    | 13,169    | 1589    | 0,024  | 311    |
| 11    | 13,284    | 4621    | 0,069  | 1047   |
| 12    | 13,355    | 3560    | 0,053  | 928    |
| 13    | 13,473    | 1049    | 0,016  | 336    |
| 14    | 13,667    | 4952    | 0,074  | 852    |
| 15    | 14,197    | 2379    | 0,035  | 262    |
| 16    | 14,605    | 1820    | 0,027  | 354    |
| 17    | 14,882    | 2546    | 0,038  | 482    |
| 18    | 15,224    | 5857    | 0,087  | 490    |
| 19    | 16,691    | 2410    | 0,036  | 342    |
| 20    | 17,125    | 4460    | 0,066  | 369    |
| 21    | 18,368    | 1088    | 0,016  | 105    |

| Peak# | Ret. Time | Area    | Area%   | Height |
|-------|-----------|---------|---------|--------|
| Total |           | 6724770 | 100,000 | 871988 |

Figure S5. HPLC chromatogram of compound **12**.

# ==== Shimadzu LabSolutions Analysis Report ====

Sample Name : SIRT21\_500uM  
 Sample ID : SIRT21\_500uM  
 Data Filename : SIRT21\_500uM\_new\_p\_corr.lcd  
 Method Filename : MAGL254 MeOH.lcm

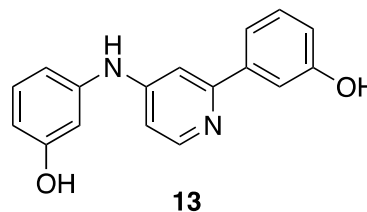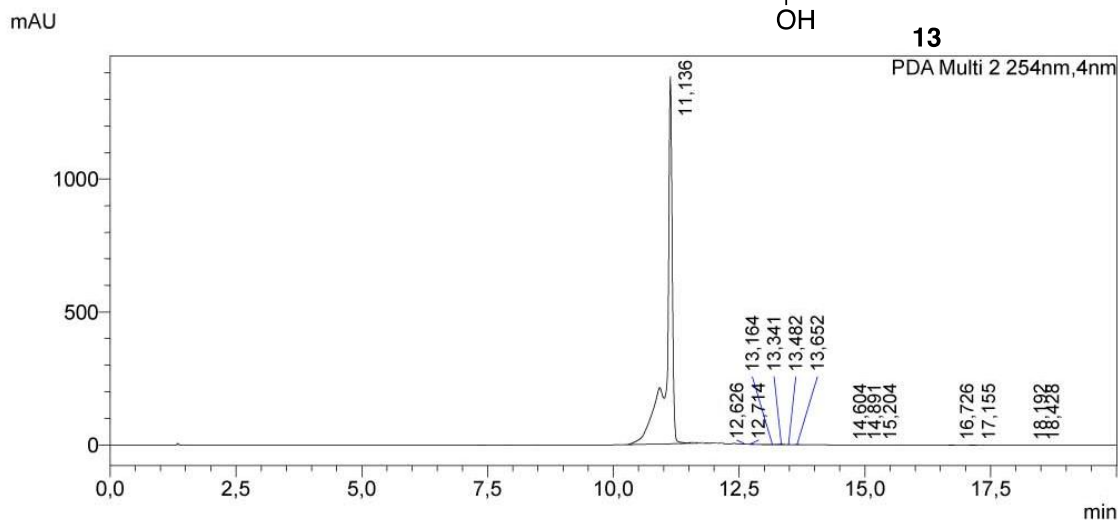

PDA Ch2 254nm

| Peak# | Ret. Time | Area     | Area%   | Height  |
|-------|-----------|----------|---------|---------|
| 1     | 11,136    | 10739228 | 99,424  | 1380323 |
| 2     | 12,626    | 2110     | 0,020   | 545     |
| 3     | 12,714    | 6023     | 0,056   | 1019    |
| 4     | 13,164    | 9502     | 0,088   | 960     |
| 5     | 13,341    | 12407    | 0,115   | 1708    |
| 6     | 13,482    | 2018     | 0,019   | 610     |
| 7     | 13,652    | 9458     | 0,088   | 1609    |
| 8     | 14,604    | 1009     | 0,009   | 179     |
| 9     | 14,891    | 1642     | 0,015   | 324     |
| 10    | 15,204    | 9434     | 0,087   | 878     |
| 11    | 16,726    | 2105     | 0,019   | 248     |
| 12    | 17,155    | 2949     | 0,027   | 231     |
| 13    | 18,192    | 1768     | 0,016   | 177     |
| 14    | 18,428    | 1738     | 0,016   | 181     |
| Total |           | 10801391 | 100,000 | 1388992 |

**Figure S6.** HPLC chromatogram of compound **13**.

# ==== Shimadzu LabSolutions Analysis Report ====

Sample Name : SIRT18\_500uM  
 Sample ID : SIRT18\_500uM  
 Data Filename : SIRT18\_500uM\_p\_corr.lcd  
 Method Filename : MAGL254 MeOH.Tcm

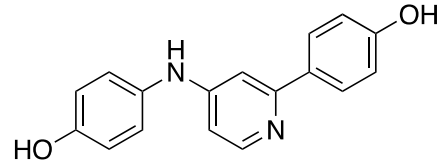

mAU

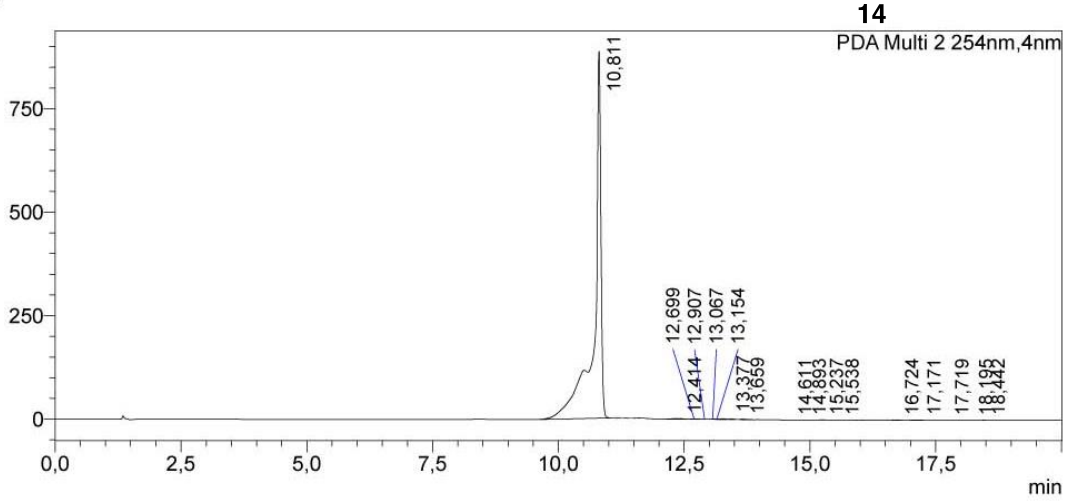

PDA Ch2 254nm

| Peak# | Ret. Time | Area    | Area%   | Height |
|-------|-----------|---------|---------|--------|
| 1     | 10,811    | 8076023 | 98,610  | 885569 |
| 2     | 12,414    | 22530   | 0,275   | 1907   |
| 3     | 12,699    | 9478    | 0,116   | 1016   |
| 4     | 12,907    | 1269    | 0,015   | 159    |
| 5     | 13,067    | 4137    | 0,051   | 773    |
| 6     | 13,154    | 5117    | 0,062   | 985    |
| 7     | 13,377    | 39466   | 0,482   | 5608   |
| 8     | 13,659    | 8743    | 0,107   | 1201   |
| 9     | 14,611    | 1196    | 0,015   | 241    |
| 10    | 14,893    | 2274    | 0,028   | 415    |
| 11    | 15,237    | 8333    | 0,102   | 699    |
| 12    | 15,538    | 1882    | 0,023   | 259    |
| 13    | 16,724    | 1776    | 0,022   | 238    |
| 14    | 17,171    | 3356    | 0,041   | 260    |
| 15    | 17,719    | 1558    | 0,019   | 113    |
| 16    | 18,195    | 1198    | 0,015   | 128    |
| 17    | 18,442    | 1528    | 0,019   | 157    |
| Total |           | 8189866 | 100,000 | 899728 |

Figure S7. HPLC chromatogram of compound 14.



# ==== Shimadzu LabSolutions Analysis Report ====

Sample Name : SIRT19\_500uM  
 Sample ID : SIRT19\_500uM  
 Data Filename : SIRT19\_500uM\_new\_p.lcd  
 Method Filename : MAGL254 MeOH.lcm

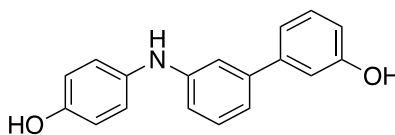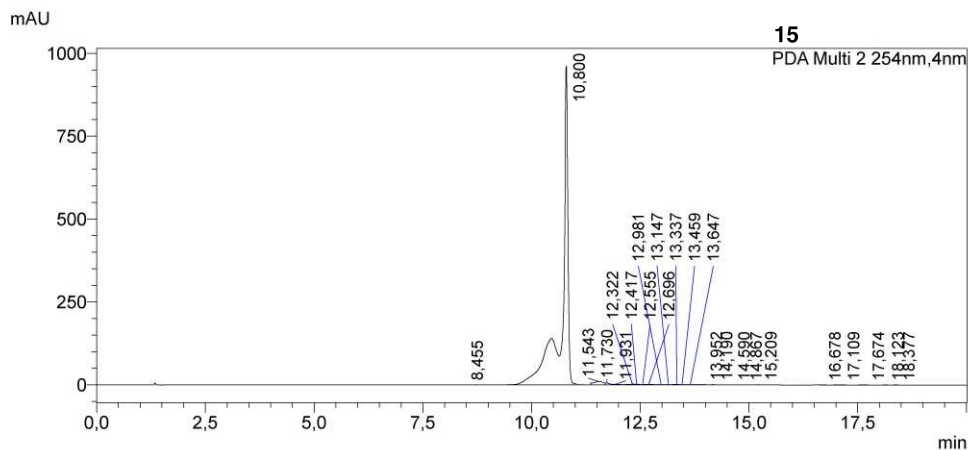

PDA Ch2 254nm

| Peak# | Ret. Time | Area    | Area%  | Height |
|-------|-----------|---------|--------|--------|
| 1     | 8,455     | 4167    | 0,044  | 242    |
| 2     | 10,800    | 9068261 | 96,524 | 961042 |
| 3     | 11,543    | 151190  | 1,609  | 10250  |
| 4     | 11,730    | 38814   | 0,413  | 6092   |
| 5     | 11,931    | 16244   | 0,173  | 1664   |
| 6     | 12,322    | 19953   | 0,212  | 2074   |
| 7     | 12,417    | 12736   | 0,136  | 2257   |
| 8     | 12,555    | 4323    | 0,046  | 875    |
| 9     | 12,696    | 14629   | 0,156  | 1273   |
| 10    | 12,981    | 6806    | 0,072  | 671    |
| 11    | 13,147    | 7800    | 0,083  | 858    |
| 12    | 13,337    | 10927   | 0,116  | 1163   |
| 13    | 13,459    | 3464    | 0,037  | 679    |
| 14    | 13,647    | 5683    | 0,060  | 805    |
| 15    | 13,952    | 2194    | 0,023  | 239    |
| 16    | 14,190    | 2412    | 0,026  | 293    |
| 17    | 14,590    | 2135    | 0,023  | 406    |
| 18    | 14,867    | 3084    | 0,033  | 586    |
| 19    | 15,209    | 7729    | 0,082  | 760    |
| 20    | 16,678    | 2762    | 0,029  | 394    |
| 21    | 17,109    | 5232    | 0,056  | 424    |

| Peak# | Ret. Time | Area    | Area%   | Height |
|-------|-----------|---------|---------|--------|
| 22    | 17,674    | 2093    | 0,022   | 160    |
| 23    | 18,123    | 1099    | 0,012   | 101    |
| 24    | 18,377    | 1100    | 0,012   | 130    |
| Total |           | 9394835 | 100,000 | 993439 |

Figure S8. HPLC chromatogram of compound 15.

# ==== Shimadzu LabSolutions Analysis Report ====

Sample Name : SIRT37\_500uM  
 Sample ID : SIRT37\_500uM  
 Data Filename : SIRT37\_500uM\_p.lcd  
 Method Filename : MAGL254\_MeOH.lcm

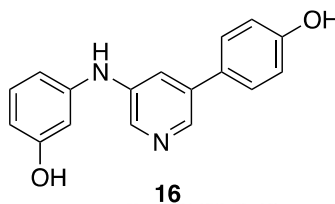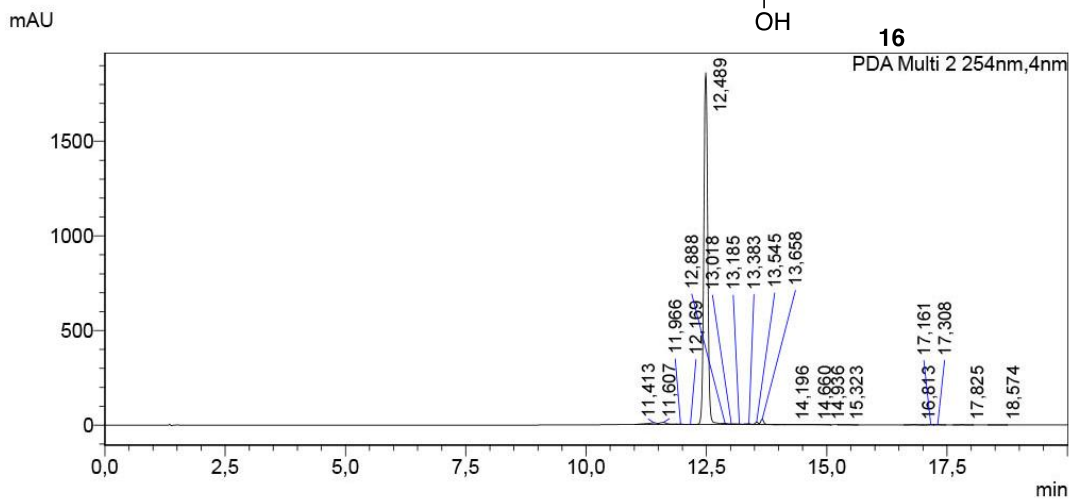

PDA Ch2 254nm

| Peak# | Ret. Time | Area     | Area%  | Height  |
|-------|-----------|----------|--------|---------|
| 1     | 11,413    | 128483   | 1,145  | 8654    |
| 2     | 11,607    | 110571   | 0,985  | 9843    |
| 3     | 11,966    | 14408    | 0,128  | 2411    |
| 4     | 12,169    | 4179     | 0,037  | 937     |
| 5     | 12,489    | 10714501 | 95,451 | 1858054 |
| 6     | 12,888    | 13488    | 0,120  | 3753    |
| 7     | 13,018    | 1191     | 0,011  | 408     |
| 8     | 13,185    | 1826     | 0,016  | 420     |
| 9     | 13,383    | 25436    | 0,227  | 4191    |
| 10    | 13,545    | 57768    | 0,515  | 13034   |
| 11    | 13,658    | 123069   | 1,096  | 27649   |
| 12    | 14,196    | 4447     | 0,040  | 275     |
| 13    | 14,660    | 2648     | 0,024  | 469     |
| 14    | 14,936    | 4056     | 0,036  | 644     |
| 15    | 15,323    | 6065     | 0,054  | 591     |
| 16    | 16,813    | 3353     | 0,030  | 415     |
| 17    | 17,161    | 2776     | 0,025  | 366     |
| 18    | 17,308    | 3084     | 0,027  | 408     |
| 19    | 17,825    | 2507     | 0,022  | 204     |
| 20    | 18,574    | 1262     | 0,011  | 114     |

| Peak# | Ret. Time | Area     | Area%   | Height  |
|-------|-----------|----------|---------|---------|
| Total |           | 11225117 | 100,000 | 1932838 |

Figure S9. HPLC chromatogram of compound **16**.

# ==== Shimadzu LabSolutions Analysis Report ====

Sample Name : SIRT24  
 Sample ID : SIRT24  
 Data Filename : SIRT24\_p.lcd  
 Method Filename : MAGL254\_MeOH.lcm

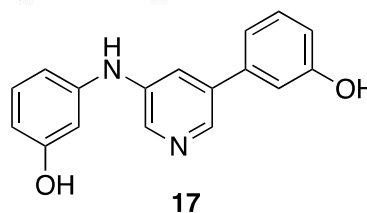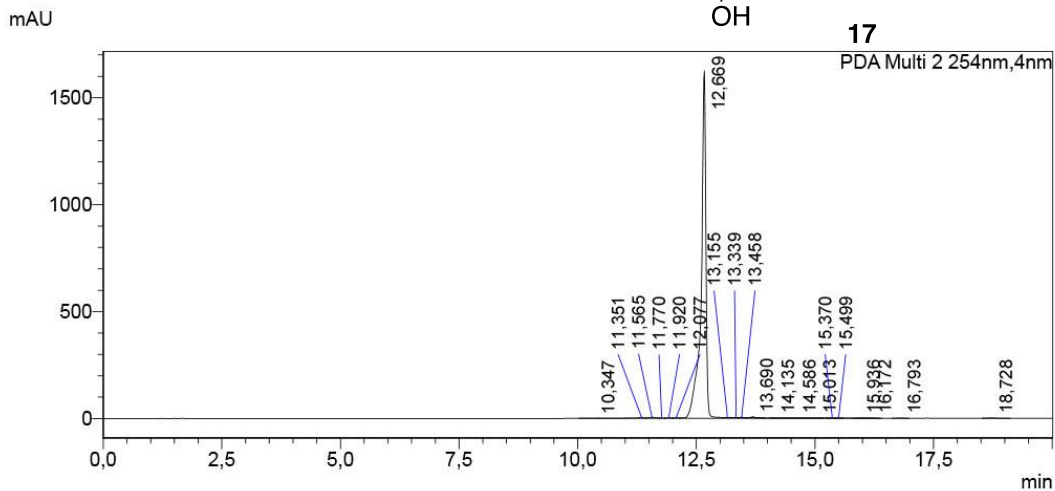

PDA Ch2 254nm

| Peak# | Ret. Time | Area     | Area%  | Height  |
|-------|-----------|----------|--------|---------|
| 1     | 10,347    | 2796     | 0,024  | 210     |
| 2     | 11,351    | 61877    | 0,521  | 3035    |
| 3     | 11,565    | 54870    | 0,462  | 4694    |
| 4     | 11,770    | 12806    | 0,108  | 1924    |
| 5     | 11,920    | 19663    | 0,166  | 2410    |
| 6     | 12,077    | 20918    | 0,176  | 3021    |
| 7     | 12,669    | 11617332 | 97,794 | 1624225 |
| 8     | 13,155    | 4787     | 0,040  | 779     |
| 9     | 13,339    | 3759     | 0,032  | 868     |
| 10    | 13,458    | 10797    | 0,091  | 1955    |
| 11    | 13,690    | 36794    | 0,310  | 5434    |
| 12    | 14,135    | 1850     | 0,016  | 207     |
| 13    | 14,586    | 2851     | 0,024  | 387     |
| 14    | 15,013    | 4415     | 0,037  | 603     |
| 15    | 15,370    | 3407     | 0,029  | 520     |
| 16    | 15,499    | 1407     | 0,012  | 237     |
| 17    | 15,936    | 1304     | 0,011  | 162     |
| 18    | 16,172    | 8410     | 0,071  | 1055    |
| 19    | 16,793    | 3196     | 0,027  | 421     |
| 20    | 18,728    | 6209     | 0,052  | 592     |

| Peak# | Ret. Time | Area     | Area%   | Height  |
|-------|-----------|----------|---------|---------|
| Total |           | 11879446 | 100,000 | 1652740 |

**Figure S10.** HPLC chromatogram of compound **17**.

# ==== Shimadzu LabSolutions Analysis Report ====

Sample Name : CG1468\_500uM  
 Sample ID : CG1468\_500uM  
 Data Filename : CG1468\_500uM\_p.lcd  
 Method Filename : MAGL254.lcm

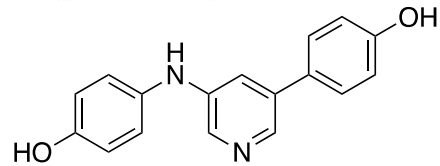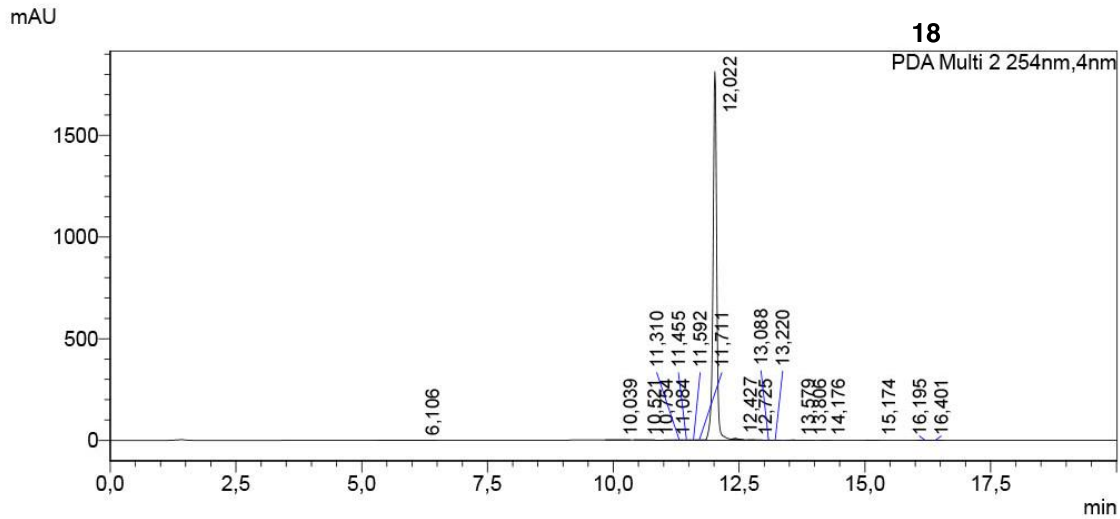

PDA Ch2 254nm

| Peak# | Ret. Time | Area    | Area%  | Height  |
|-------|-----------|---------|--------|---------|
| 1     | 6,106     | 34198   | 0,354  | 1142    |
| 2     | 10,039    | 6626    | 0,069  | 413     |
| 3     | 10,521    | 1518    | 0,016  | 306     |
| 4     | 10,754    | 1995    | 0,021  | 318     |
| 5     | 11,084    | 7360    | 0,076  | 730     |
| 6     | 11,310    | 2261    | 0,023  | 393     |
| 7     | 11,455    | 6635    | 0,069  | 1234    |
| 8     | 11,592    | 5599    | 0,058  | 1088    |
| 9     | 11,711    | 5377    | 0,056  | 1025    |
| 10    | 12,022    | 9539610 | 98,739 | 1812064 |
| 11    | 12,427    | 31226   | 0,323  | 5398    |
| 12    | 12,725    | 1026    | 0,011  | 310     |
| 13    | 13,088    | 1241    | 0,013  | 290     |
| 14    | 13,220    | 1598    | 0,017  | 287     |
| 15    | 13,579    | 6279    | 0,065  | 1127    |
| 16    | 13,806    | 1051    | 0,011  | 204     |
| 17    | 14,176    | 2355    | 0,024  | 430     |
| 18    | 15,174    | 1376    | 0,014  | 173     |
| 19    | 16,195    | 2614    | 0,027  | 408     |
| 20    | 16,401    | 1449    | 0,015  | 237     |

Figure S11. HPLC chromatogram of compound 18.

# ==== Shimadzu LabSolutions Analysis Report ====

Sample Name : SIRT23  
 Sample ID : SIRT23  
 Data Filename : SIRT23\_p.lcd  
 Method Filename : MAGL254\_MeOH.lcm

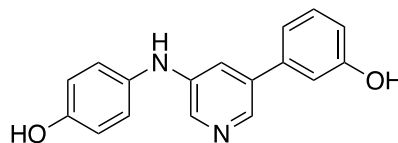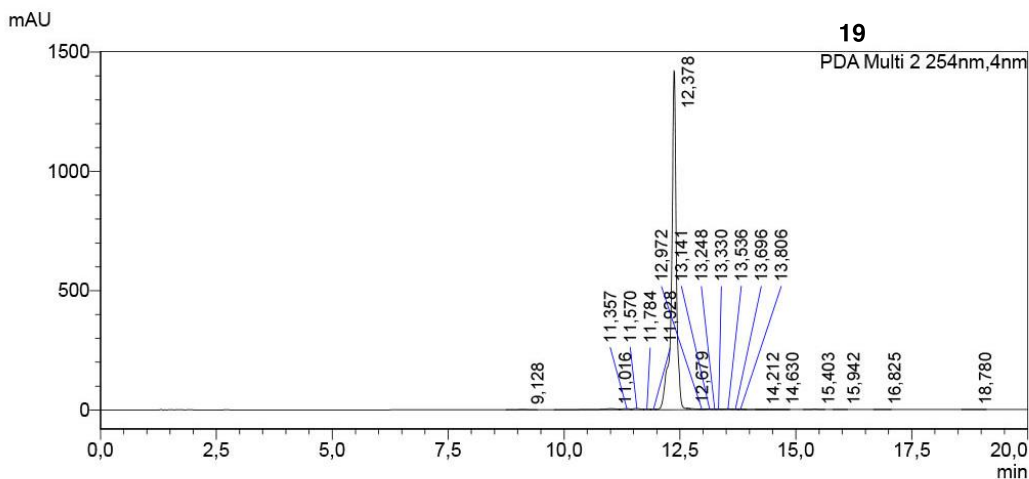

PDA Ch2 254nm

| Peak# | Ret. Time | Area     | Area%  | Height  |
|-------|-----------|----------|--------|---------|
| 1     | 9,128     | 16616    | 0,152  | 1148    |
| 2     | 11,016    | 113209   | 1,038  | 4397    |
| 3     | 11,357    | 53593    | 0,491  | 4388    |
| 4     | 11,570    | 56047    | 0,514  | 5040    |
| 5     | 11,784    | 14585    | 0,134  | 1887    |
| 6     | 11,928    | 12631    | 0,116  | 1990    |
| 7     | 12,378    | 10563886 | 96,880 | 1421615 |
| 8     | 12,679    | 1957     | 0,018  | 834     |
| 9     | 12,972    | 1967     | 0,018  | 290     |
| 10    | 13,141    | 5727     | 0,053  | 1126    |
| 11    | 13,248    | 2462     | 0,023  | 580     |
| 12    | 13,330    | 3085     | 0,028  | 627     |
| 13    | 13,536    | 16147    | 0,148  | 2165    |
| 14    | 13,696    | 9077     | 0,083  | 1813    |
| 15    | 13,806    | 7763     | 0,071  | 1447    |
| 16    | 14,212    | 2039     | 0,019  | 288     |
| 17    | 14,630    | 1739     | 0,016  | 158     |
| 18    | 15,403    | 9902     | 0,091  | 1337    |
| 19    | 15,942    | 1129     | 0,010  | 143     |
| 20    | 16,825    | 3363     | 0,031  | 435     |

| Peak# | Ret. Time | Area     | Area%   | Height  |
|-------|-----------|----------|---------|---------|
| 21    | 18,780    | 7133     | 0,065   | 710     |
| Total |           | 10904054 | 100,000 | 1452418 |

Figure S12. HPLC chromatogram of compound 19.

# ==== Shimadzu LabSolutions Analysis Report ====

Sample Name : SIRT27\_500uM  
 Sample ID : SIRT27\_500uM  
 Data Filename : SIRT27\_500uM\_p.lcd  
 Method Filename : MAGL254 MeOH.lcm

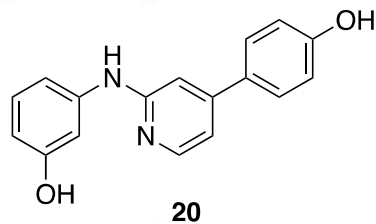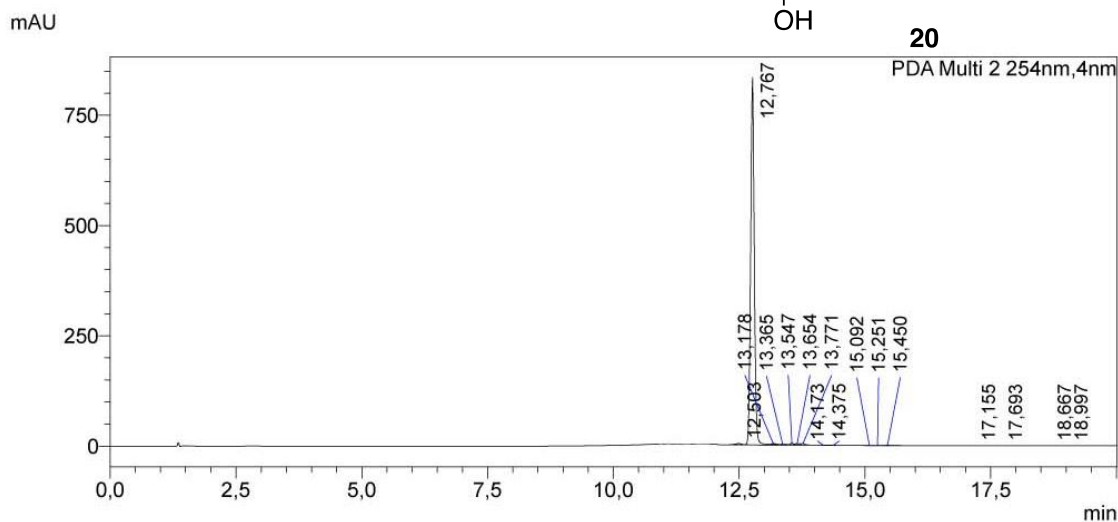

PDA Ch2 254nm

| Peak# | Ret. Time | Area    | Area%   | Height |
|-------|-----------|---------|---------|--------|
| 1     | 12,503    | 29074   | 0,654   | 2850   |
| 2     | 12,767    | 4324537 | 97,303  | 832912 |
| 3     | 13,178    | 9815    | 0,221   | 2020   |
| 4     | 13,365    | 5359    | 0,121   | 787    |
| 5     | 13,547    | 15663   | 0,352   | 3669   |
| 6     | 13,654    | 17088   | 0,384   | 2691   |
| 7     | 13,771    | 16563   | 0,373   | 3147   |
| 8     | 14,173    | 3864    | 0,087   | 409    |
| 9     | 14,375    | 3011    | 0,068   | 423    |
| 10    | 15,092    | 2010    | 0,045   | 270    |
| 11    | 15,251    | 2307    | 0,052   | 361    |
| 12    | 15,450    | 8812    | 0,198   | 835    |
| 13    | 17,155    | 1176    | 0,026   | 146    |
| 14    | 17,693    | 2212    | 0,050   | 138    |
| 15    | 18,667    | 1510    | 0,034   | 161    |
| 16    | 18,997    | 1424    | 0,032   | 131    |
| Total |           | 4444423 | 100,000 | 850951 |

**Figure S13.** HPLC chromatogram of compound **20**.

# ==== Shimadzu LabSolutions Analysis Report ====

Sample Name : SIRT28\_500uM  
 Sample ID : SIRT28\_500uM  
 Data Filename : SIRT28\_500uM\_p.lcd  
 Method Filename : MAGL254\_MeOH.lcm

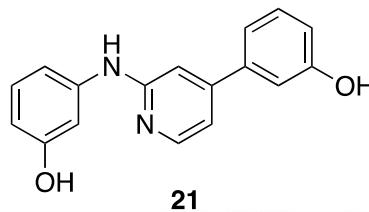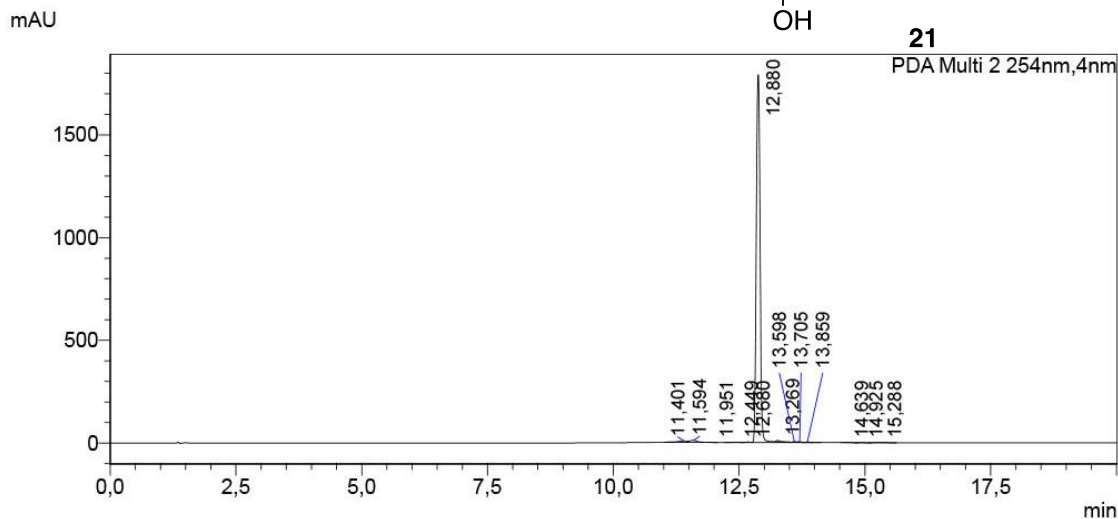

PDA Ch2 254nm

| Peak# | Ret. Time | Area    | Area%   | Height  |
|-------|-----------|---------|---------|---------|
| 1     | 11,401    | 100338  | 1,044   | 7465    |
| 2     | 11,594    | 111440  | 1,160   | 9703    |
| 3     | 11,951    | 2226    | 0,023   | 603     |
| 4     | 12,449    | 13031   | 0,136   | 1741    |
| 5     | 12,680    | 15191   | 0,158   | 2368    |
| 6     | 12,880    | 9286605 | 96,663  | 1789745 |
| 7     | 13,269    | 31291   | 0,326   | 6604    |
| 8     | 13,598    | 13936   | 0,145   | 2865    |
| 9     | 13,705    | 9464    | 0,099   | 2508    |
| 10    | 13,859    | 11646   | 0,121   | 2976    |
| 11    | 14,639    | 2616    | 0,027   | 369     |
| 12    | 14,925    | 1541    | 0,016   | 201     |
| 13    | 15,288    | 7846    | 0,082   | 605     |
| Total |           | 9607172 | 100,000 | 1827752 |

**Figure S14.** HPLC chromatogram of compound **21**.

# ==== Shimadzu LabSolutions Analysis Report ====

Sample Name : SIRT25\_2\_500uM  
 Sample ID : SIRT25\_2\_500uM  
 Data Filename : SIRT25\_2\_500uM\_p.lcd  
 Method Filename : MAGL254\_MeOH.lcm

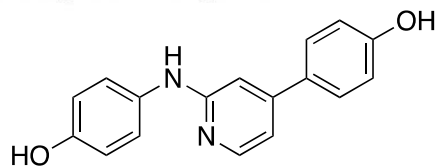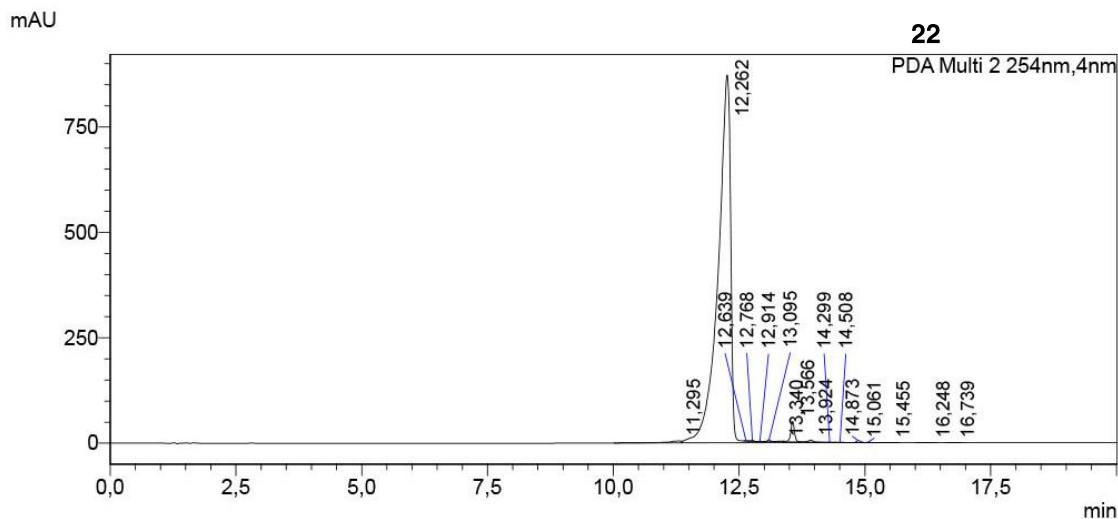

PDA Ch2 254nm

| Peak# | Ret. Time | Area     | Area%   | Height |
|-------|-----------|----------|---------|--------|
| 1     | 11,295    | 98595    | 0,623   | 4759   |
| 2     | 12,262    | 15320505 | 96,871  | 872130 |
| 3     | 12,639    | 3261     | 0,021   | 927    |
| 4     | 12,768    | 13225    | 0,084   | 2542   |
| 5     | 12,914    | 4183     | 0,026   | 1169   |
| 6     | 13,095    | 21362    | 0,135   | 4583   |
| 7     | 13,340    | 12864    | 0,081   | 1862   |
| 8     | 13,566    | 256487   | 1,622   | 48750  |
| 9     | 13,924    | 35425    | 0,224   | 4908   |
| 10    | 14,299    | 5286     | 0,033   | 655    |
| 11    | 14,508    | 4518     | 0,029   | 730    |
| 12    | 14,873    | 26836    | 0,170   | 4656   |
| 13    | 15,061    | 3318     | 0,021   | 574    |
| 14    | 15,455    | 3851     | 0,024   | 415    |
| 15    | 16,248    | 2756     | 0,017   | 253    |
| 16    | 16,739    | 2836     | 0,018   | 378    |
| Total |           | 15815308 | 100,000 | 949290 |

Figure S15. HPLC chromatogram of compound 22.



# ==== Shimadzu LabSolutions Analysis Report ====

Sample Name : SIRT26  
 Sample ID : SIRT26  
 Data Filename : SIRT26\_p.lcd  
 Method Filename : MAGL254\_MeOH.lcm

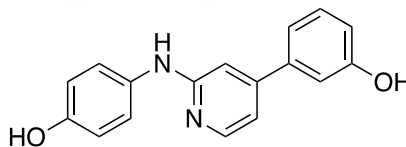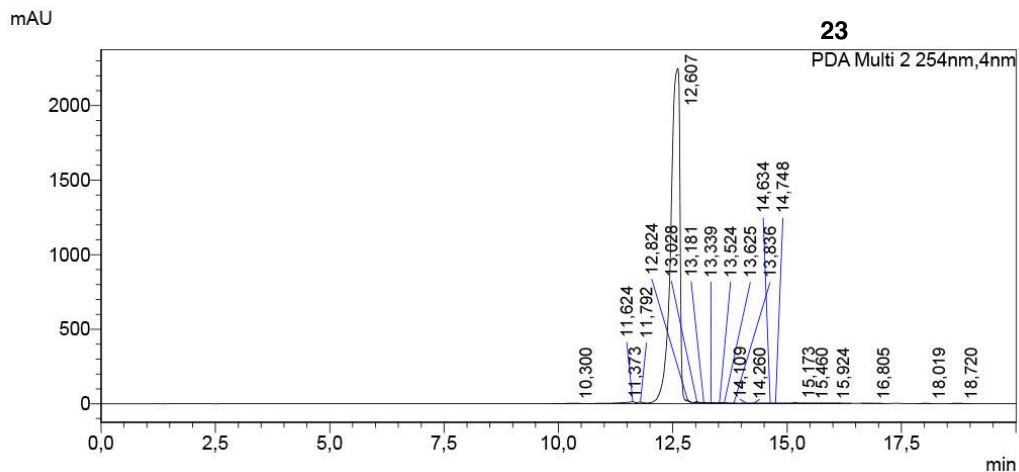

PDA Ch2 254nm

| Peak# | Ret. Time | Area     | Area%  | Height  |
|-------|-----------|----------|--------|---------|
| 1     | 10,300    | 32320    | 0,099  | 1391    |
| 2     | 11,373    | 93886    | 0,288  | 5099    |
| 3     | 11,624    | 149045   | 0,457  | 13896   |
| 4     | 11,792    | 84190    | 0,258  | 10353   |
| 5     | 12,607    | 32025622 | 98,299 | 2247278 |
| 6     | 12,824    | 20853    | 0,064  | 7899    |
| 7     | 13,028    | 28520    | 0,088  | 5972    |
| 8     | 13,181    | 14665    | 0,045  | 3036    |
| 9     | 13,339    | 10283    | 0,032  | 2759    |
| 10    | 13,524    | 15743    | 0,048  | 3026    |
| 11    | 13,625    | 15292    | 0,047  | 1968    |
| 12    | 13,836    | 2255     | 0,007  | 630     |
| 13    | 14,109    | 5490     | 0,017  | 969     |
| 14    | 14,260    | 4217     | 0,013  | 560     |
| 15    | 14,634    | 5095     | 0,016  | 746     |
| 16    | 14,748    | 5509     | 0,017  | 771     |
| 17    | 15,173    | 45976    | 0,141  | 6952    |
| 18    | 15,460    | 3525     | 0,011  | 544     |
| 19    | 15,924    | 2974     | 0,009  | 200     |
| 20    | 16,805    | 7548     | 0,023  | 778     |

| Peak# | Ret. Time | Area     | Area%   | Height  |
|-------|-----------|----------|---------|---------|
| 21    | 18,019    | 1469     | 0,005   | 165     |
| 22    | 18,720    | 5347     | 0,016   | 567     |
| Total |           | 32579822 | 100,000 | 2315559 |

Figure 16. HPLC chromatogram of compound 23.

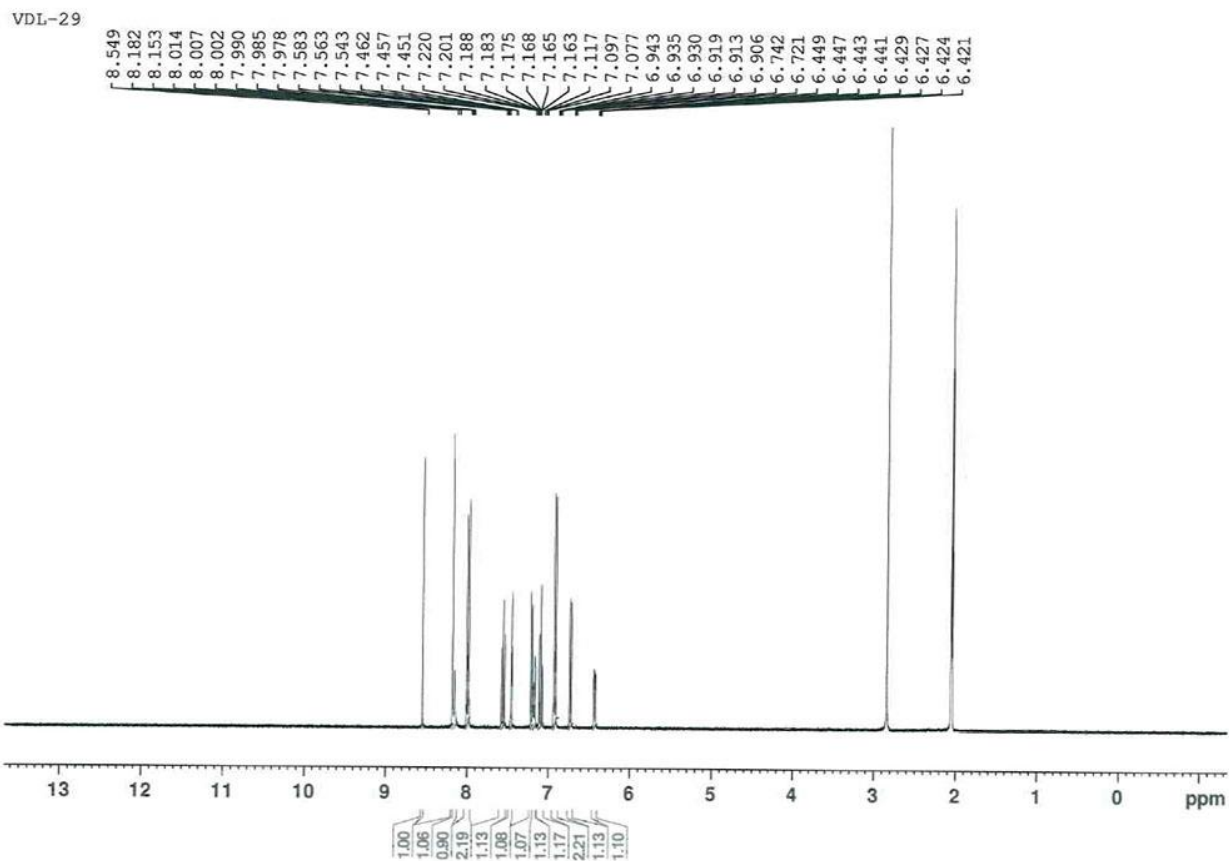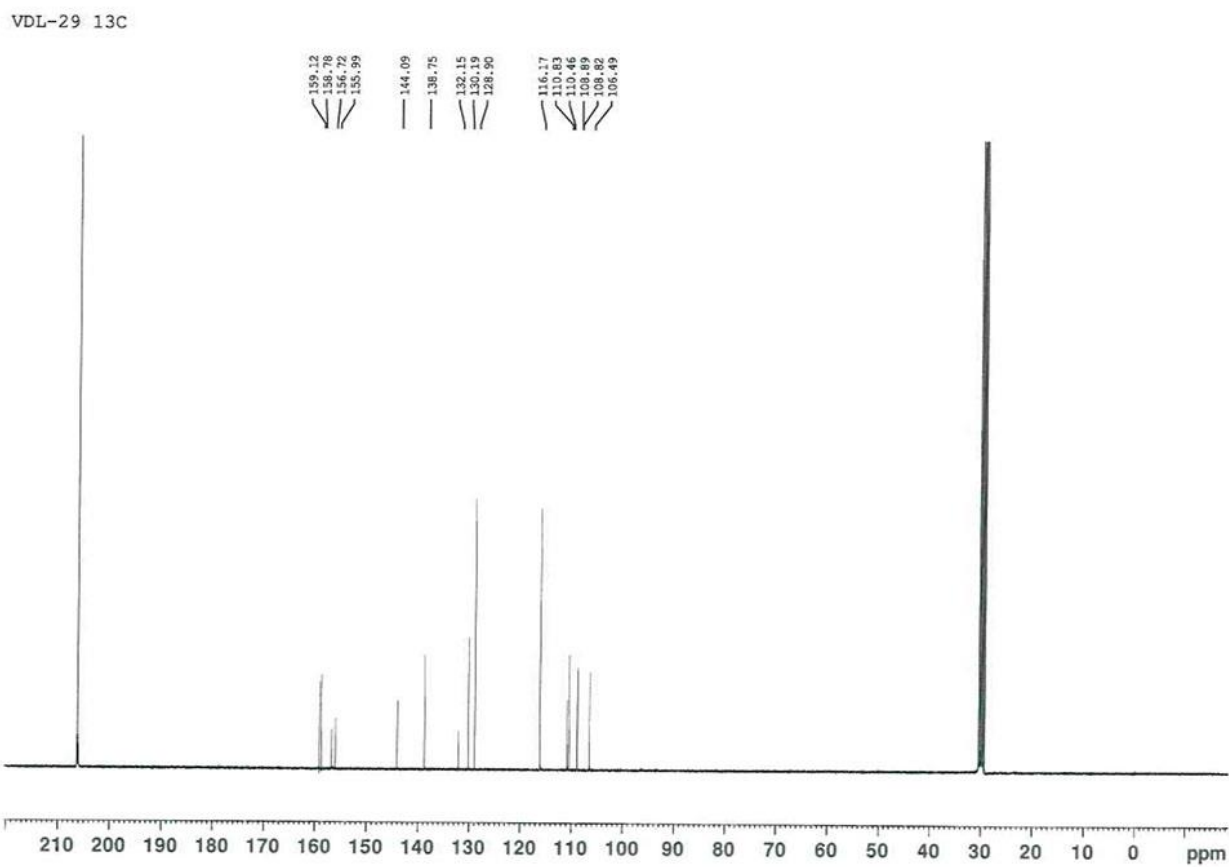

Figure S17.  $^1\text{H}$ -NMR and  $^{13}\text{C}$ -NMR of compound **8**.

VDL-44

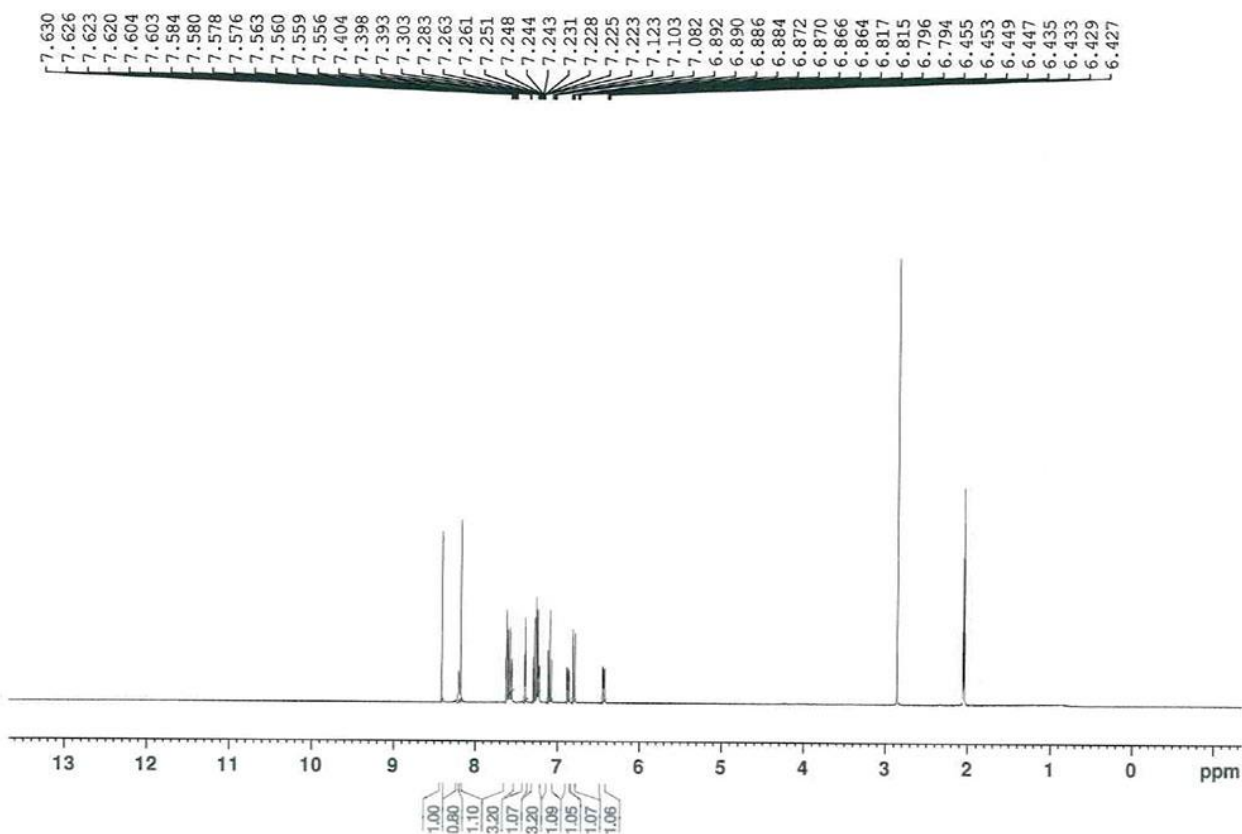

VDL-44 13C

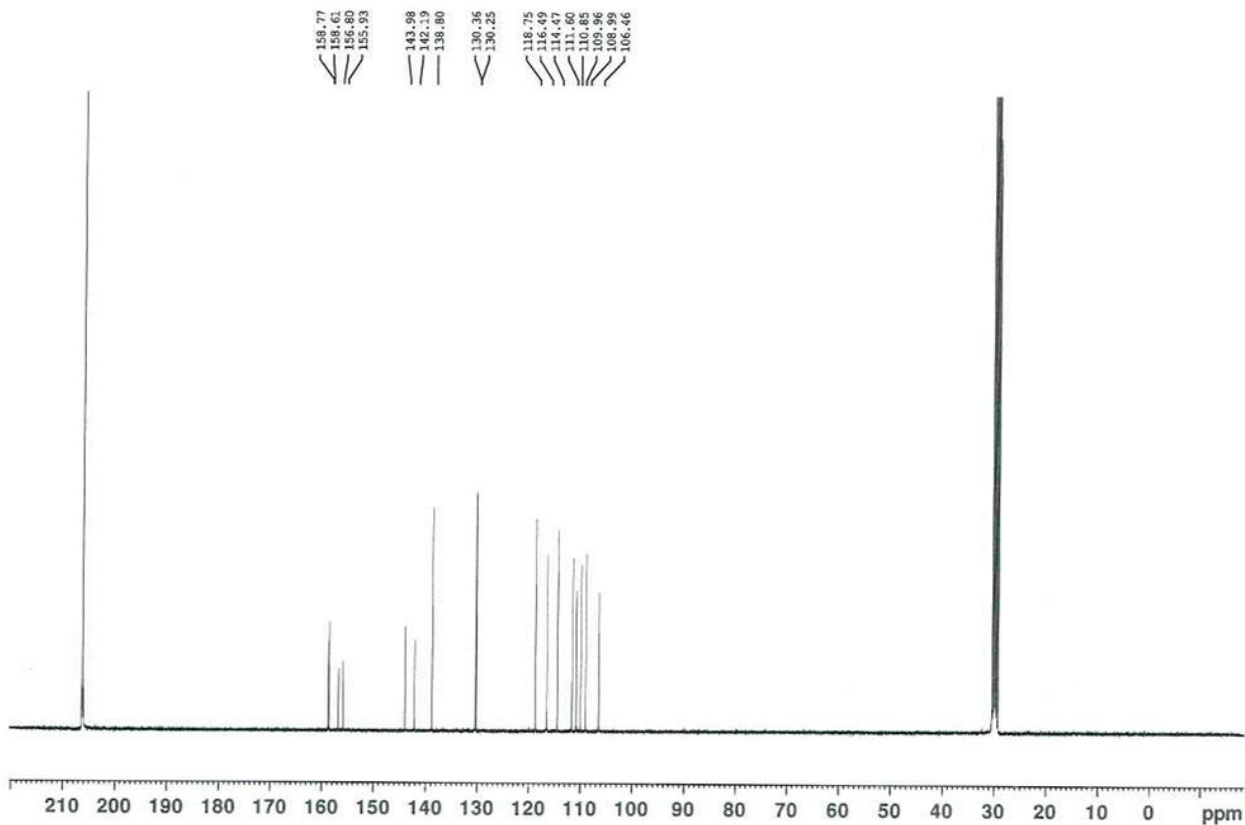

Figure S18. <sup>1</sup>H-NMR and <sup>13</sup>C-NMR of compound 9.

VDL-55-a bis

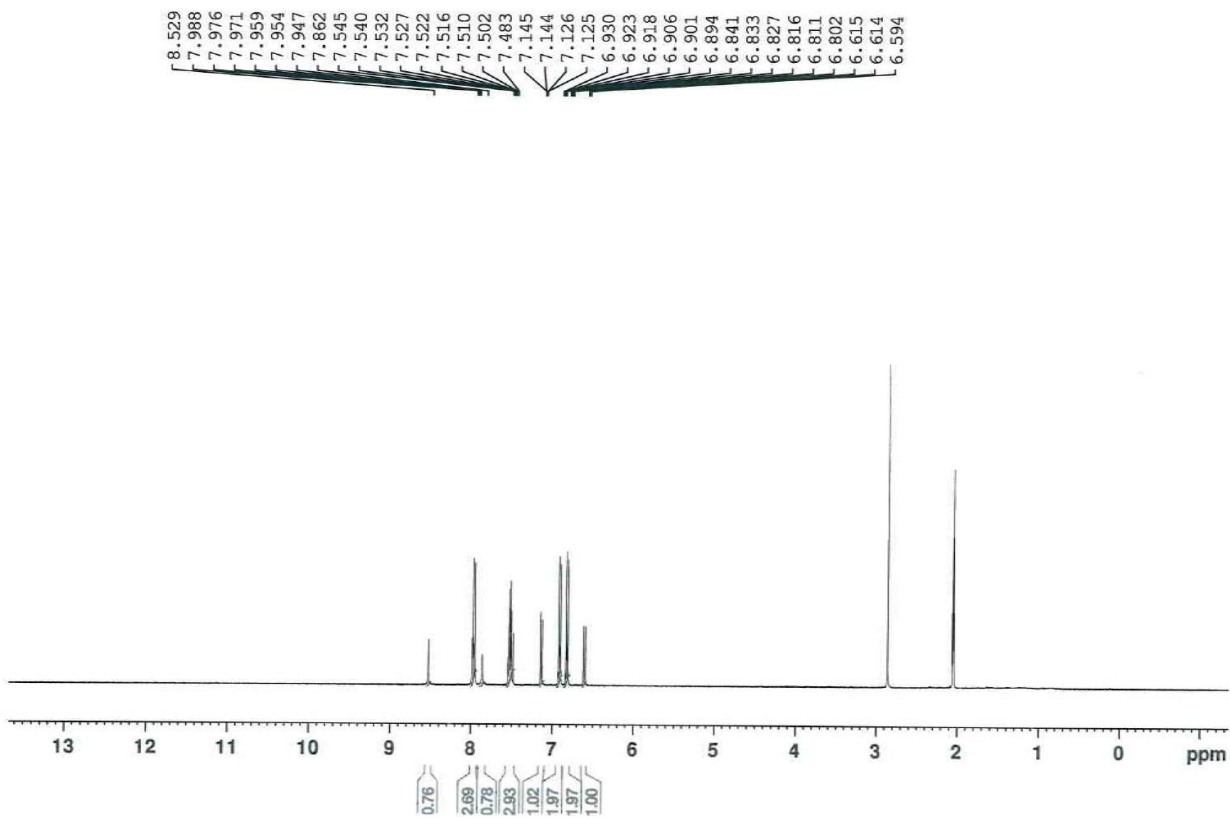

VDL-55-a bis 13C

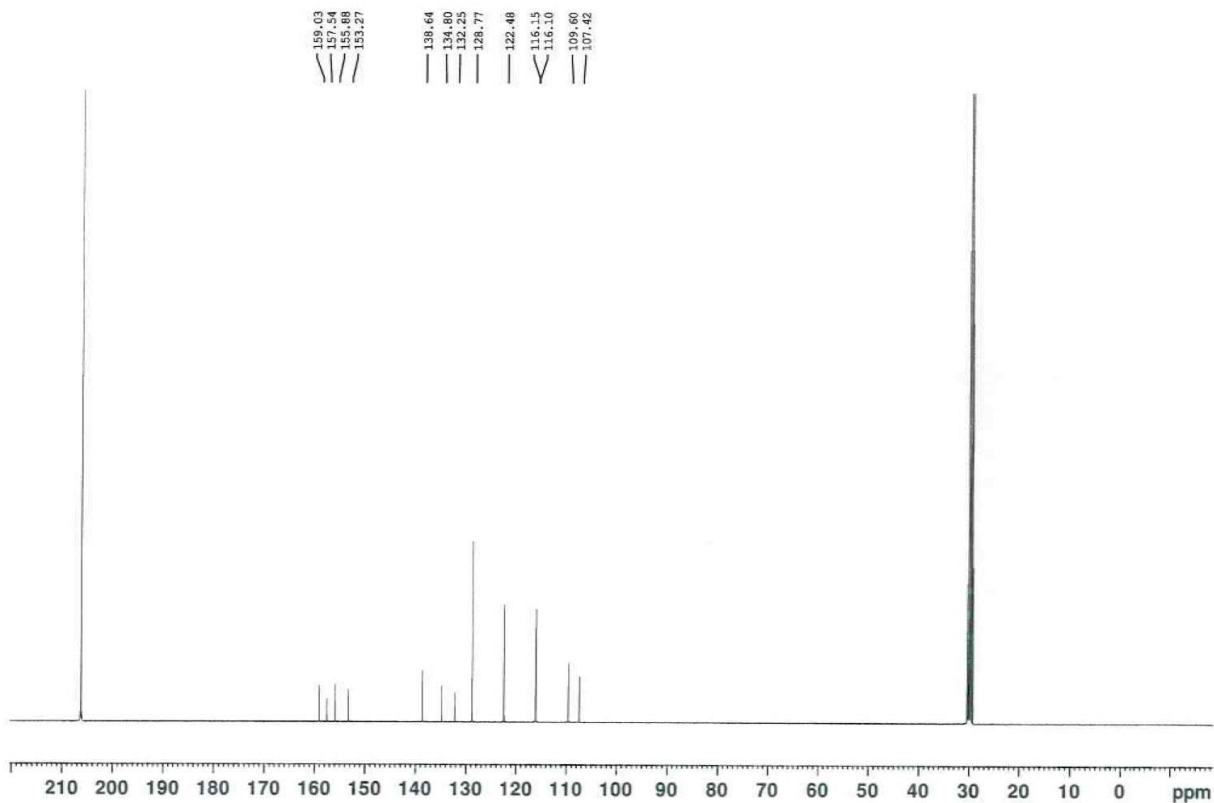

Figure S19.  $^1\text{H}$ -NMR and  $^{13}\text{C}$ -NMR of compound 10.

VDL-56

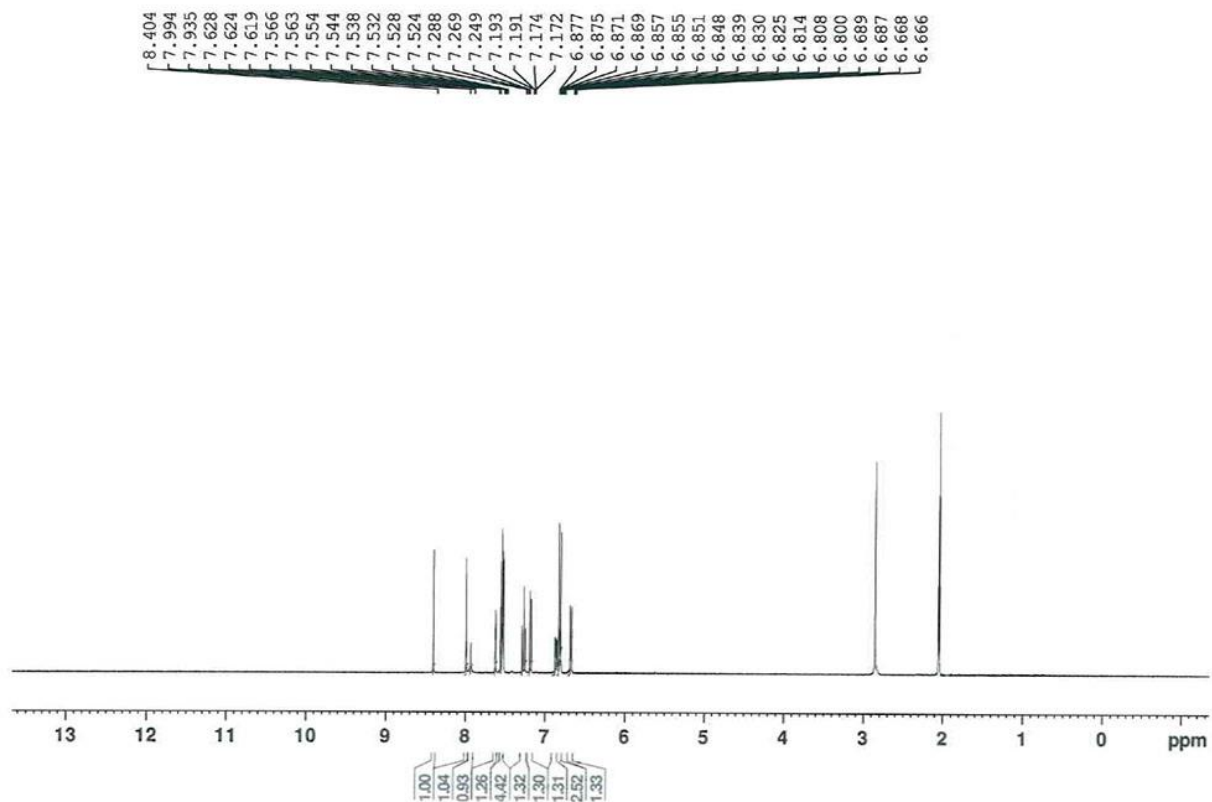

VDL-56 13C

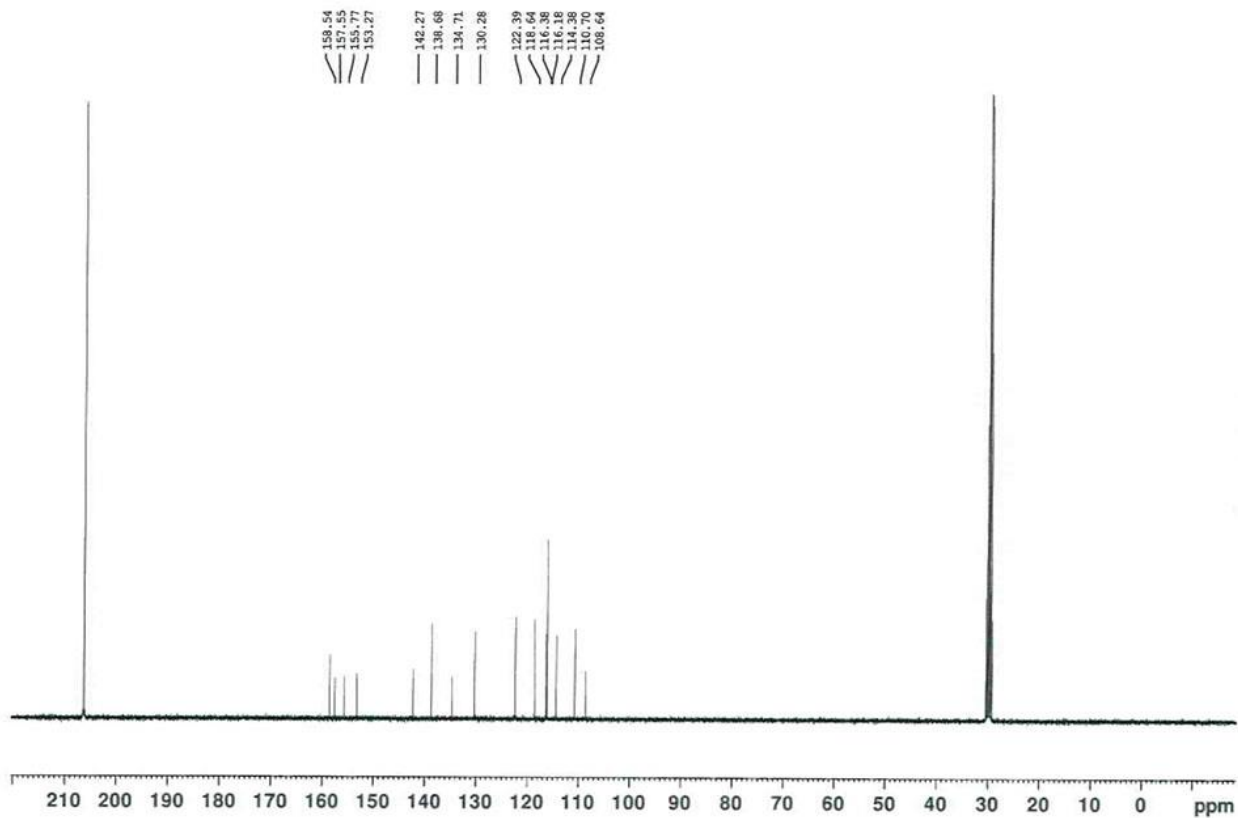

Figure S20.  $^1\text{H}$ -NMR and  $^{13}\text{C}$ -NMR of compound **11**.

GL-30

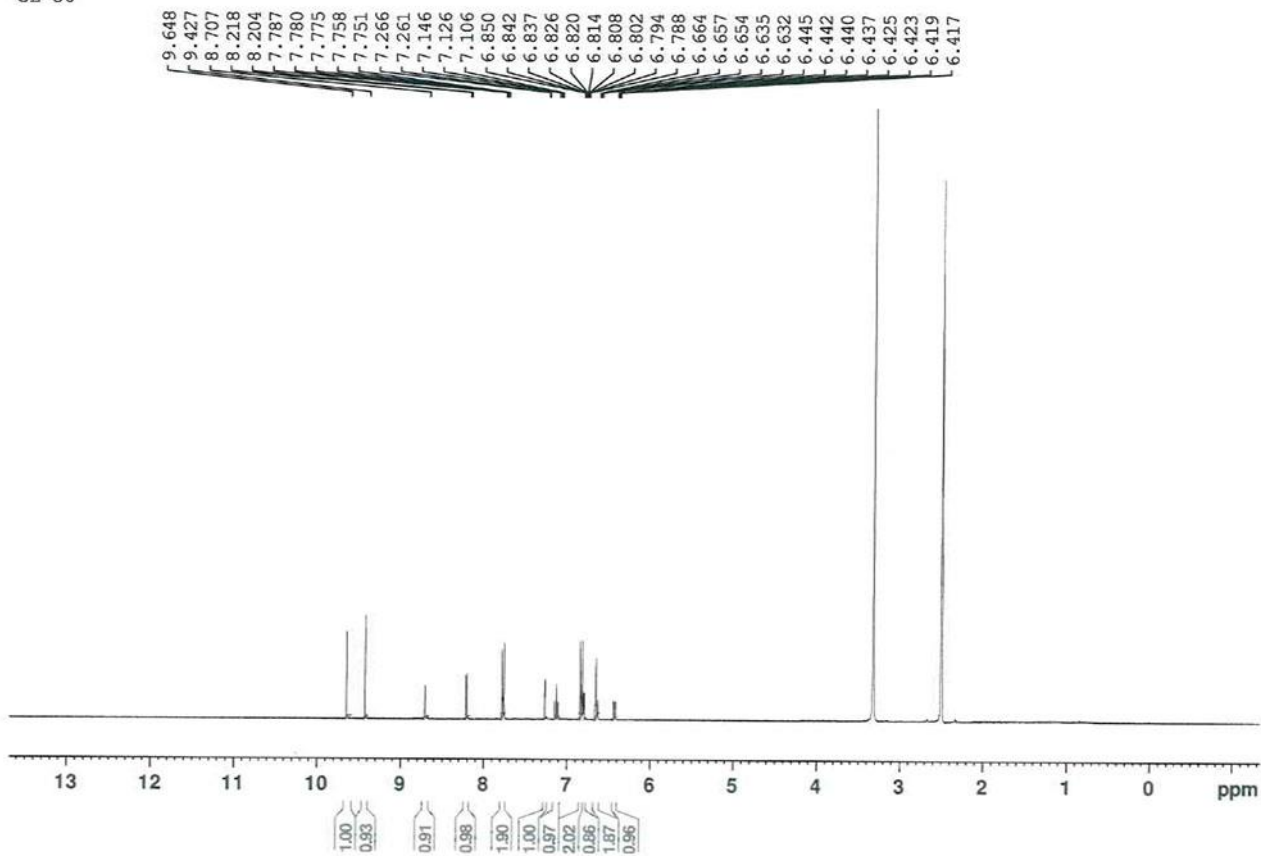

GL-30 13C

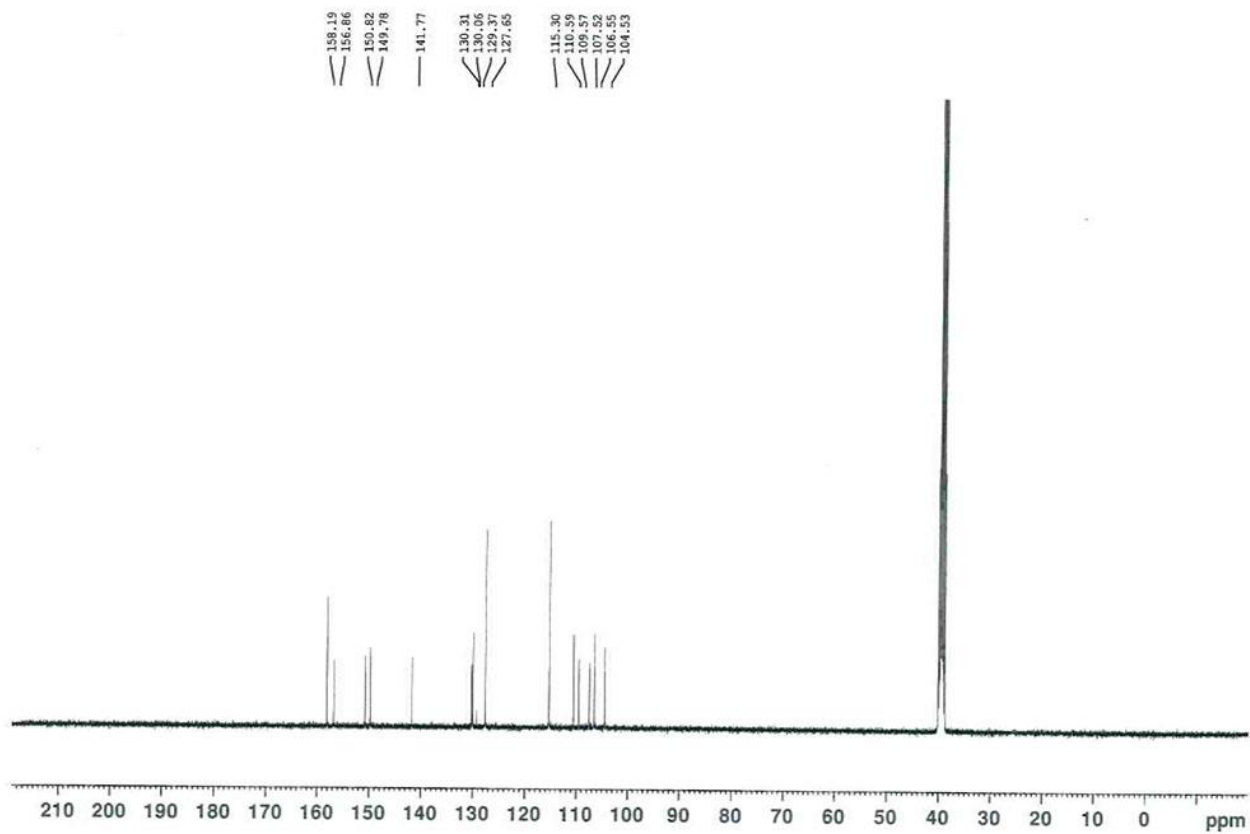

Figure S21. <sup>1</sup>H-NMR and <sup>13</sup>C-NMR of compound 12.

GL-45

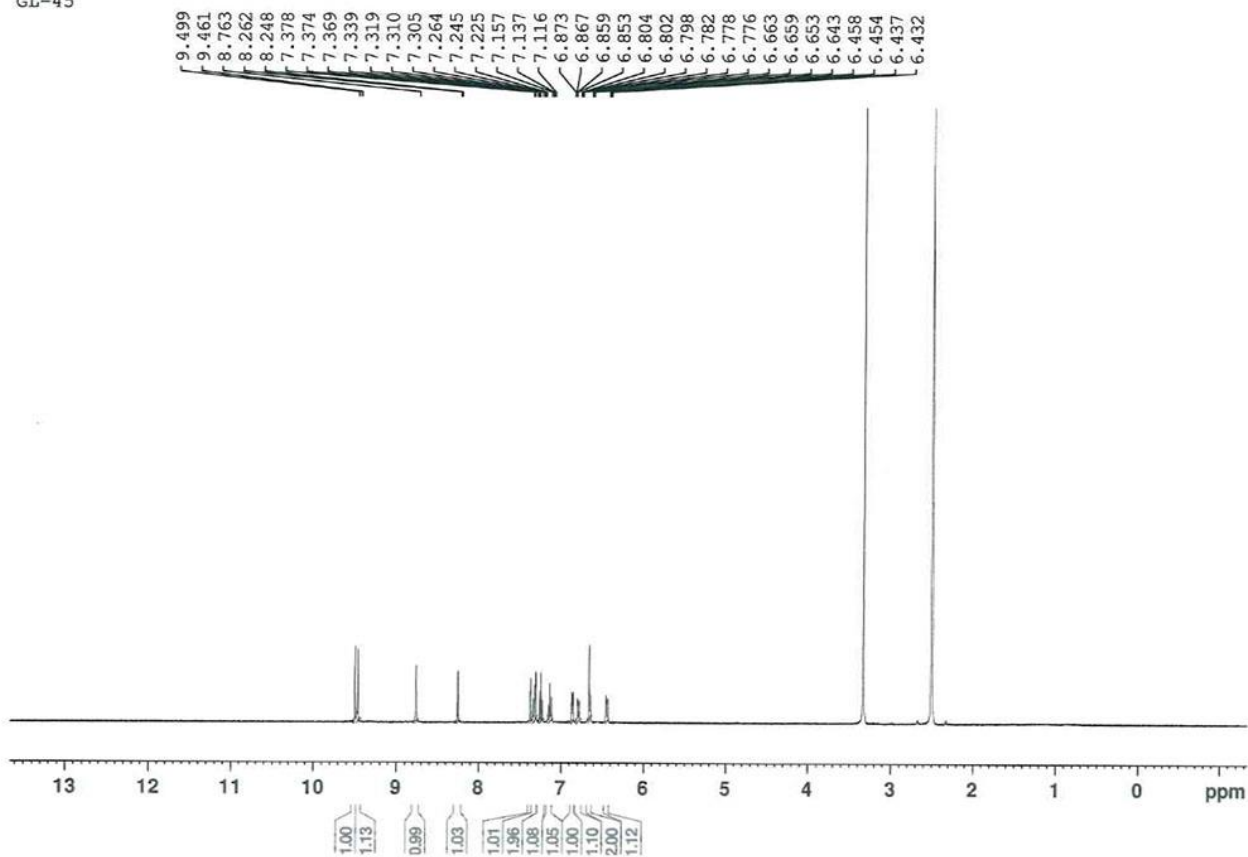

GL-45 13C

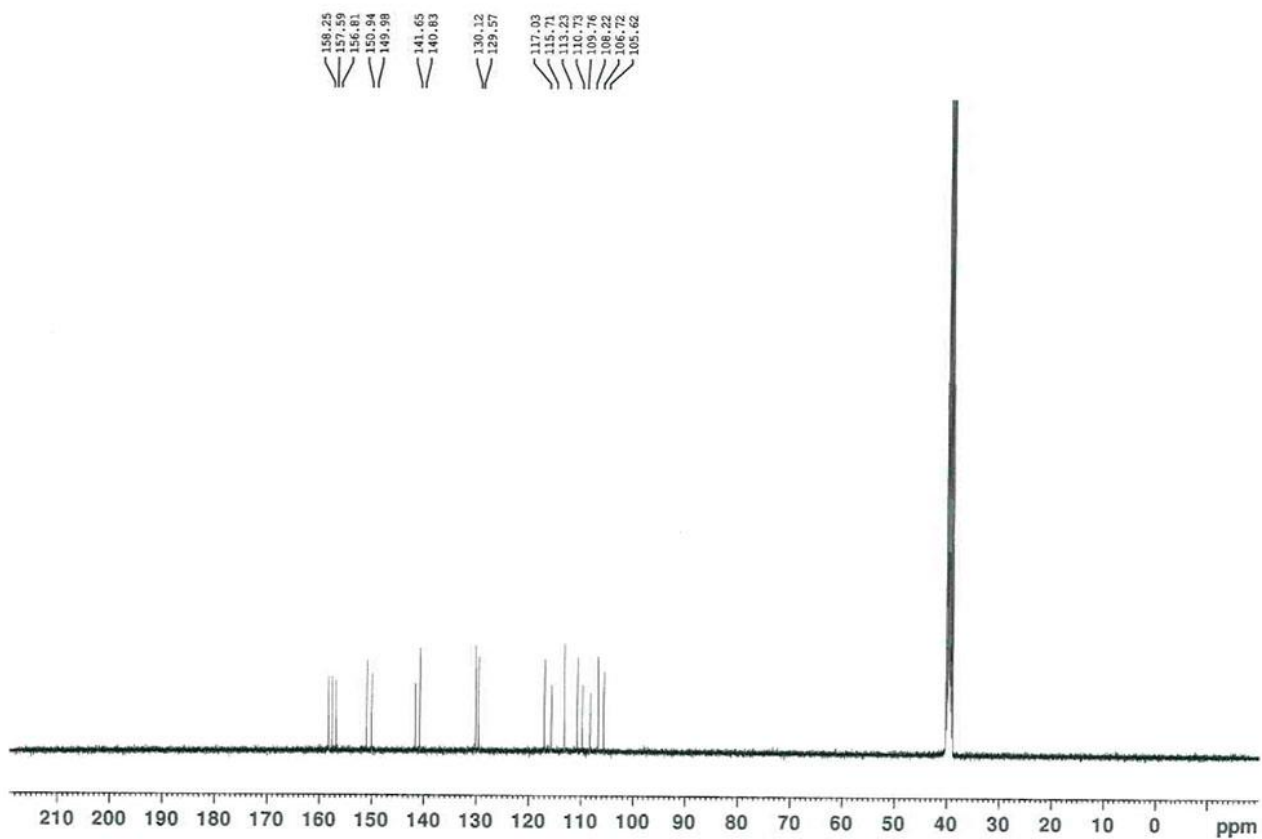

Figure S22. <sup>1</sup>H-NMR and <sup>13</sup>C-NMR of compound 13.

GL-34\_2

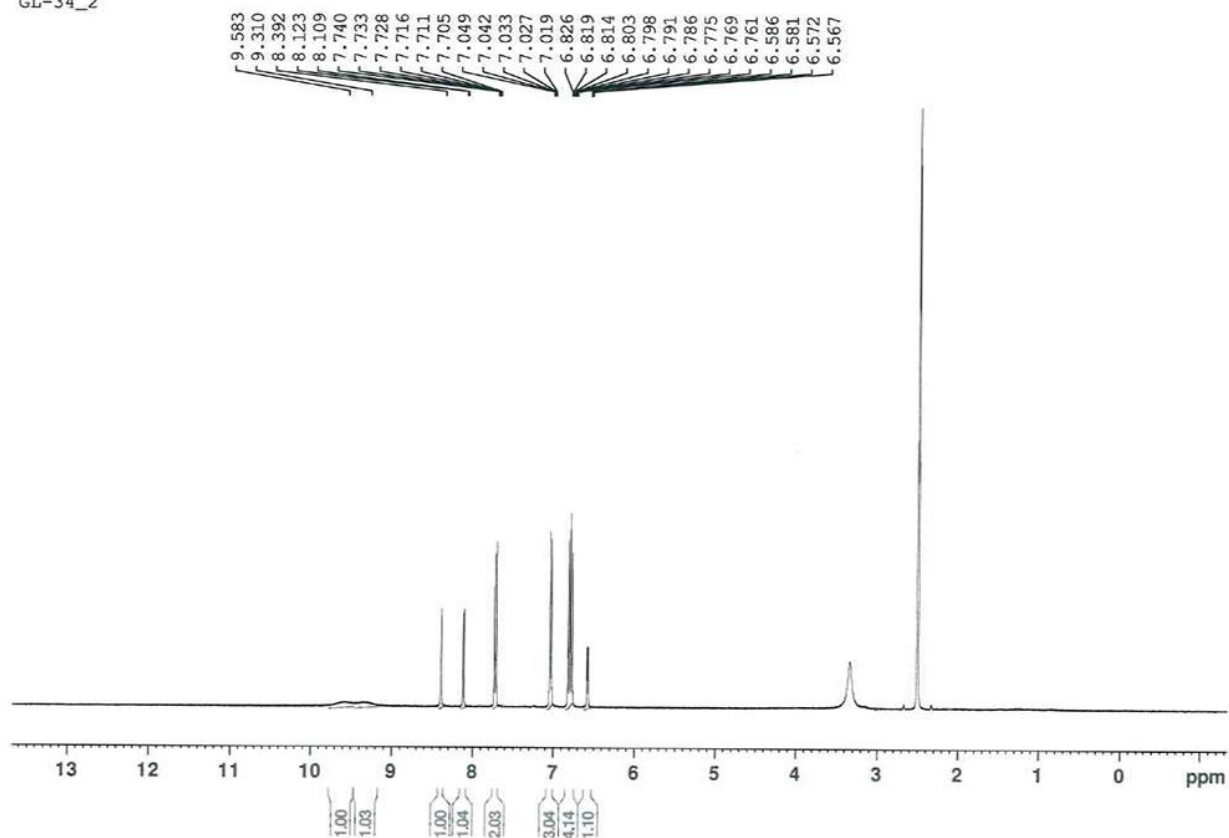

GL-34\_2 13C

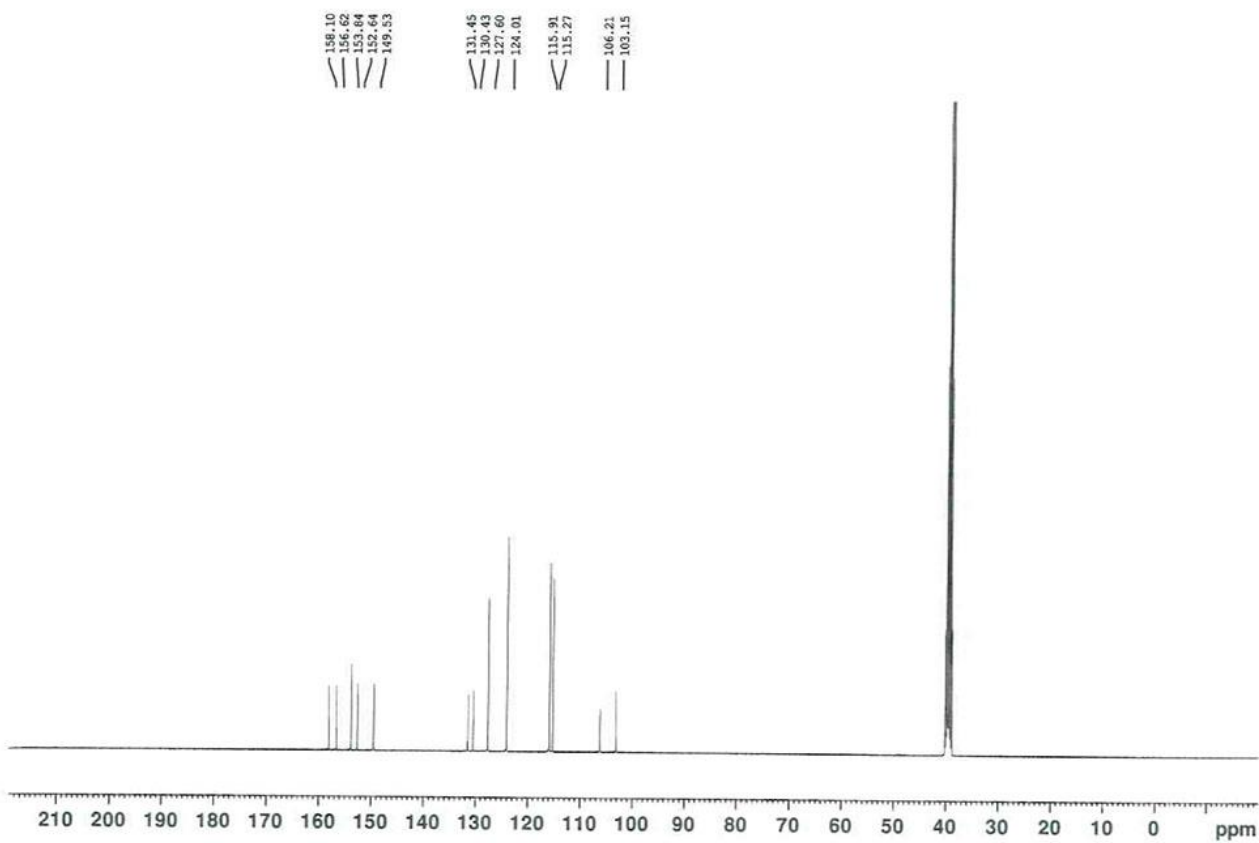

Figure S23.  $^1\text{H}$ -NMR and  $^{13}\text{C}$ -NMR of compound 14.



GL-43

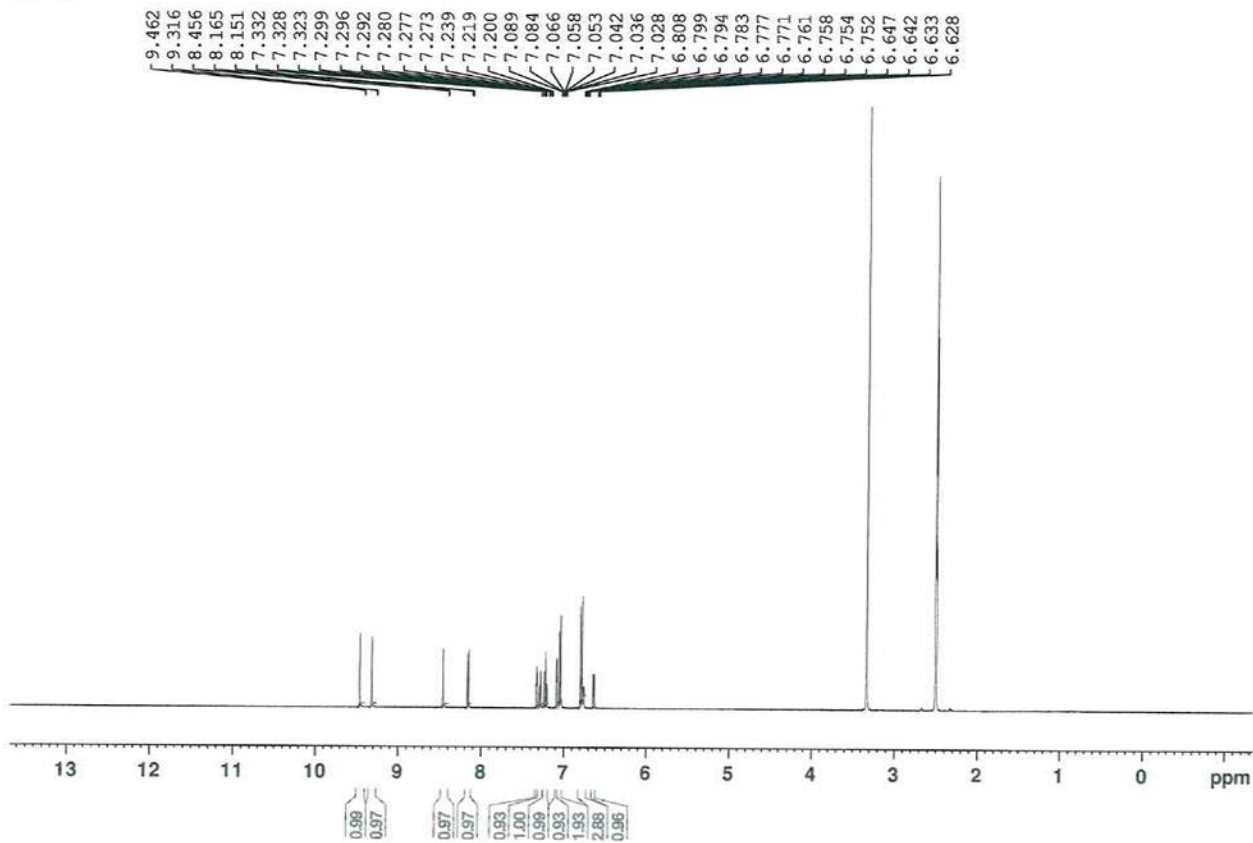

GL-43 13C

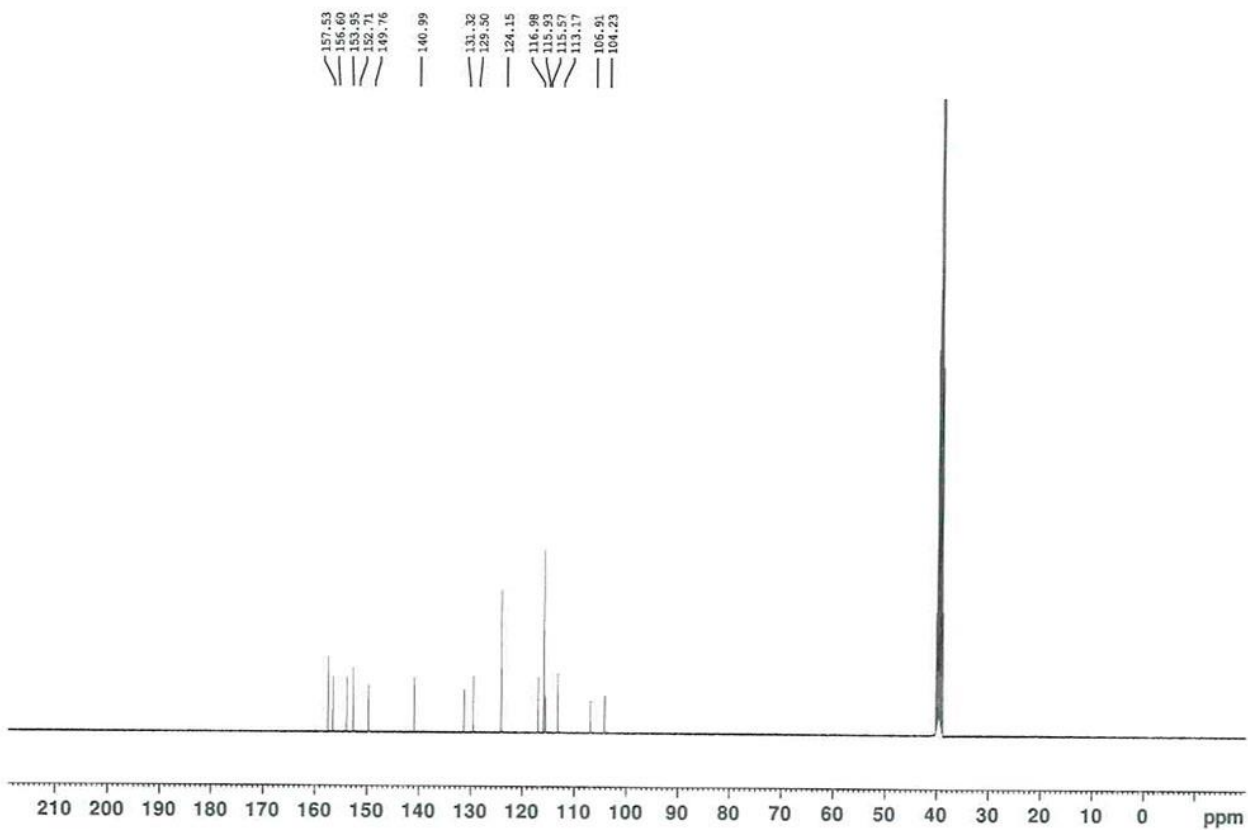

Figure S24. <sup>1</sup>H-NMR and <sup>13</sup>C-NMR of compound 15.

GL-23-2

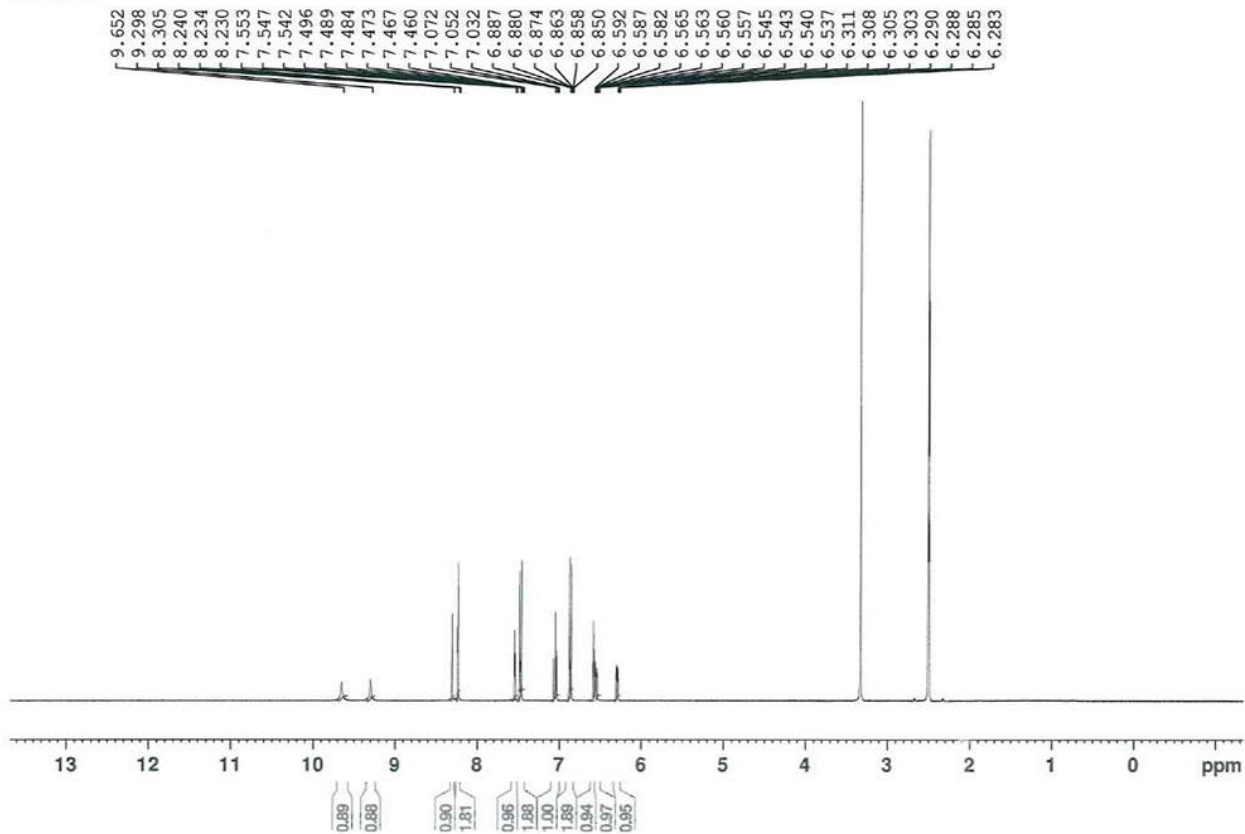

GL-23-2 13C

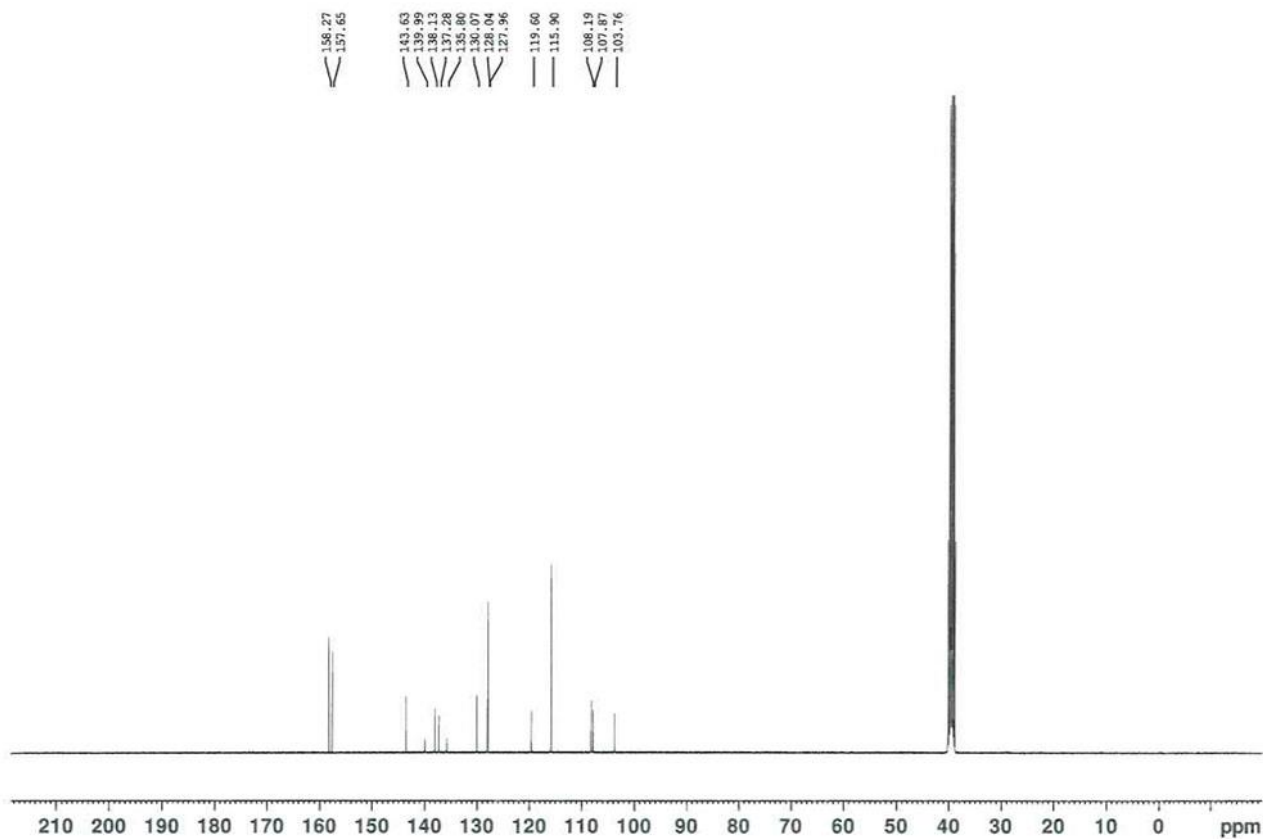

Figure S25.  $^1\text{H}$ -NMR and  $^{13}\text{C}$ -NMR of compound 16.

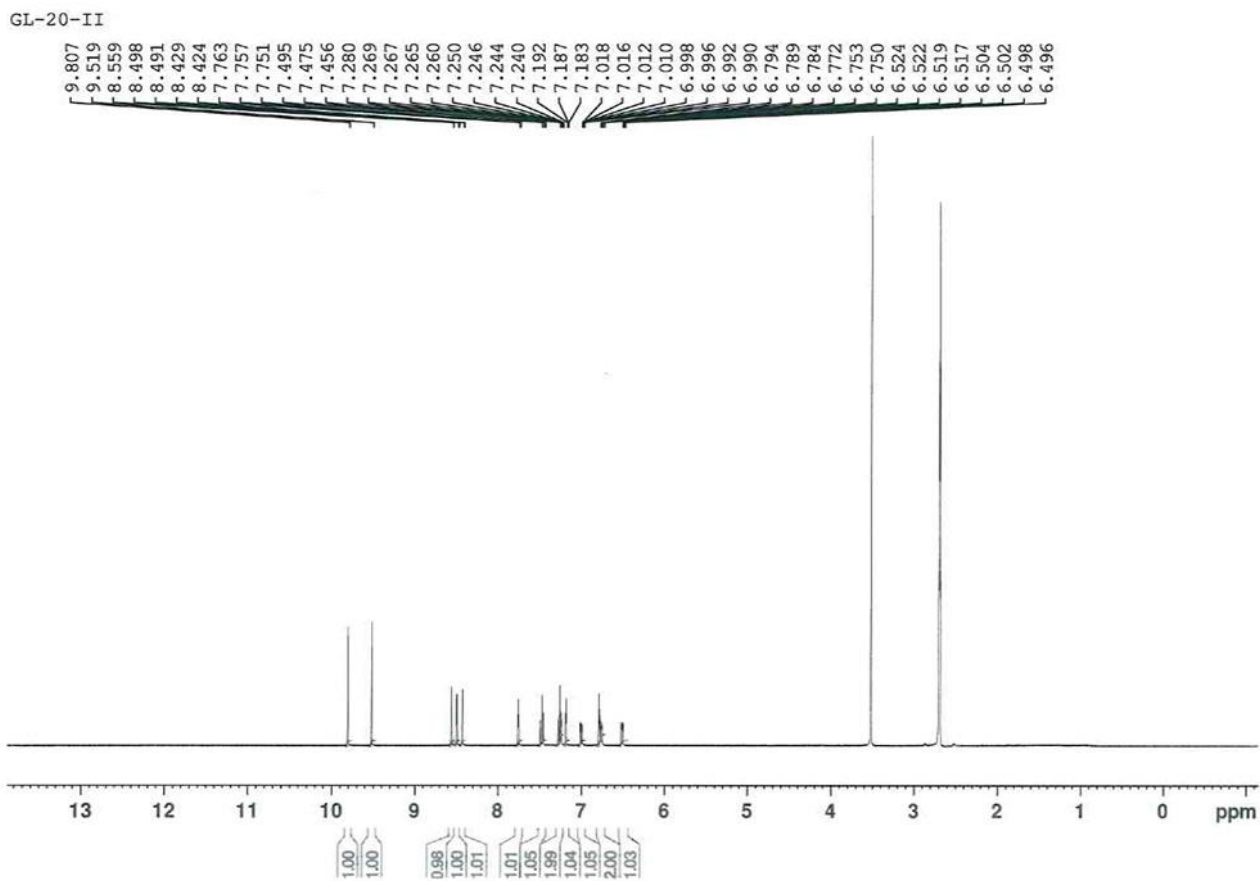

GL-20-II 13C

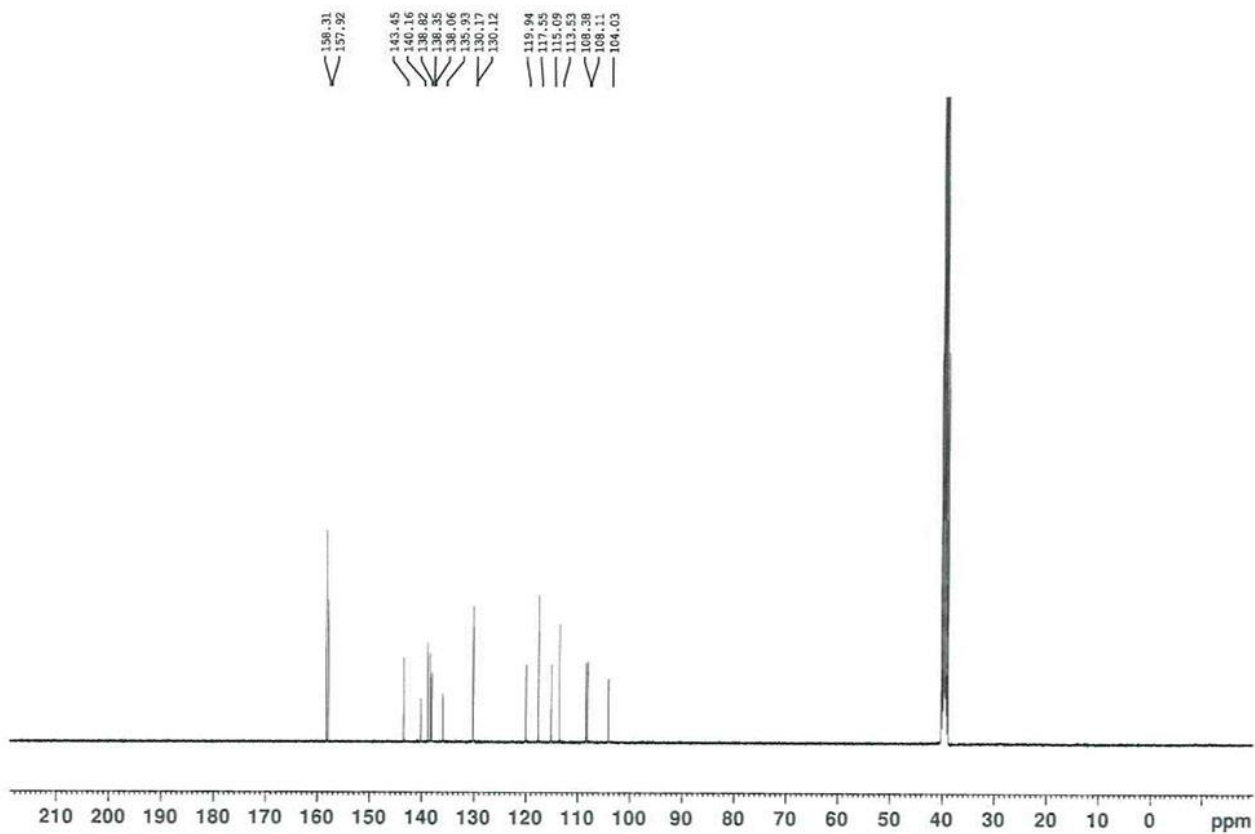

Figure S26.  $^1\text{H}$ -NMR and  $^{13}\text{C}$ -NMR of compound 17.

CG-1337

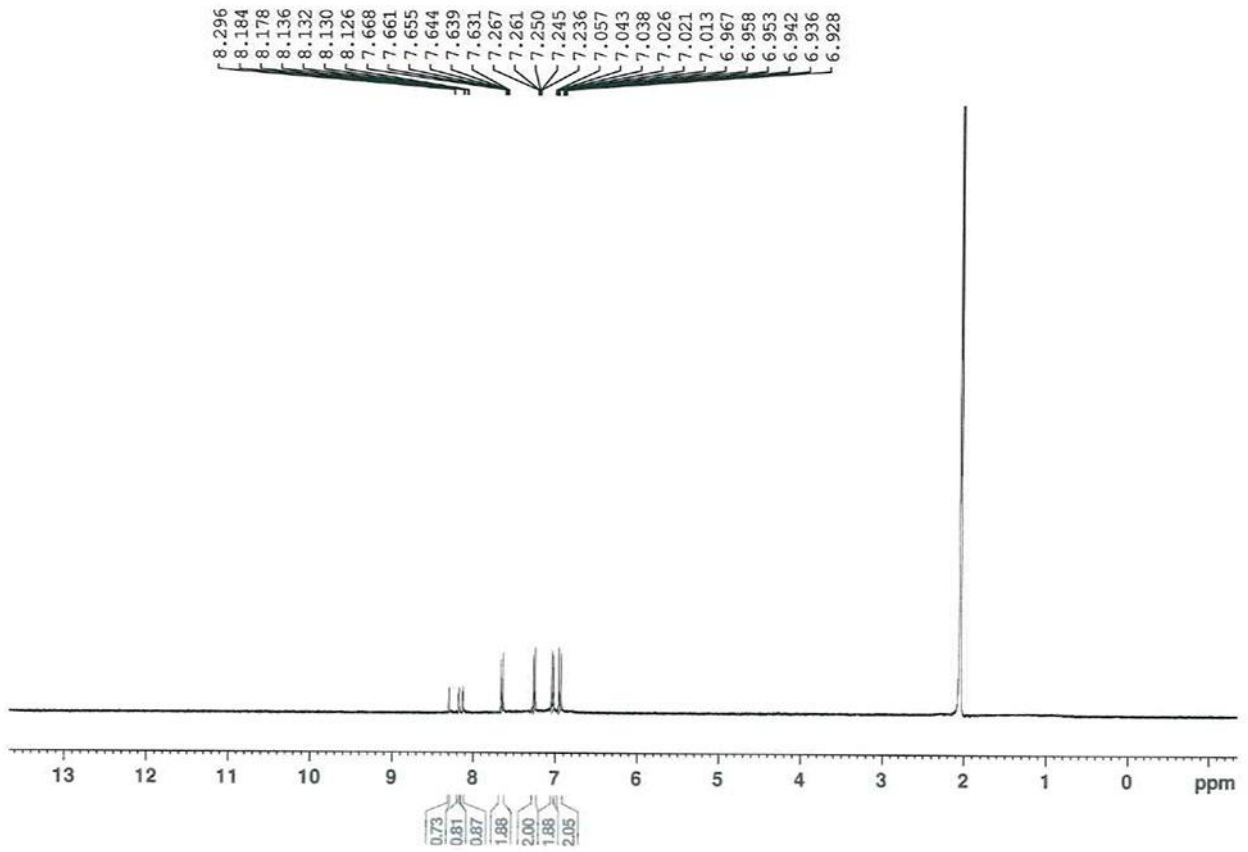

CG-1337 13C

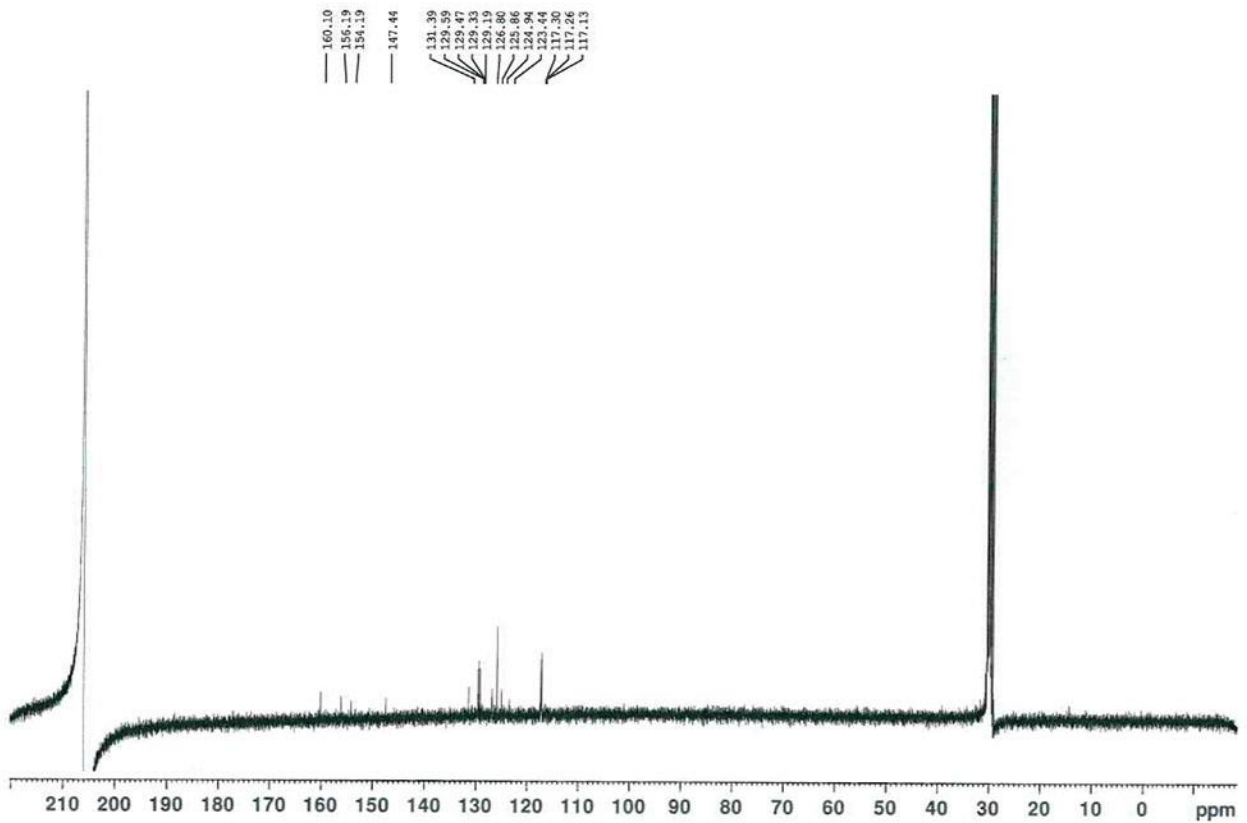

Figure S27.  $^1\text{H}$ -NMR and  $^{13}\text{C}$ -NMR of compound 18.

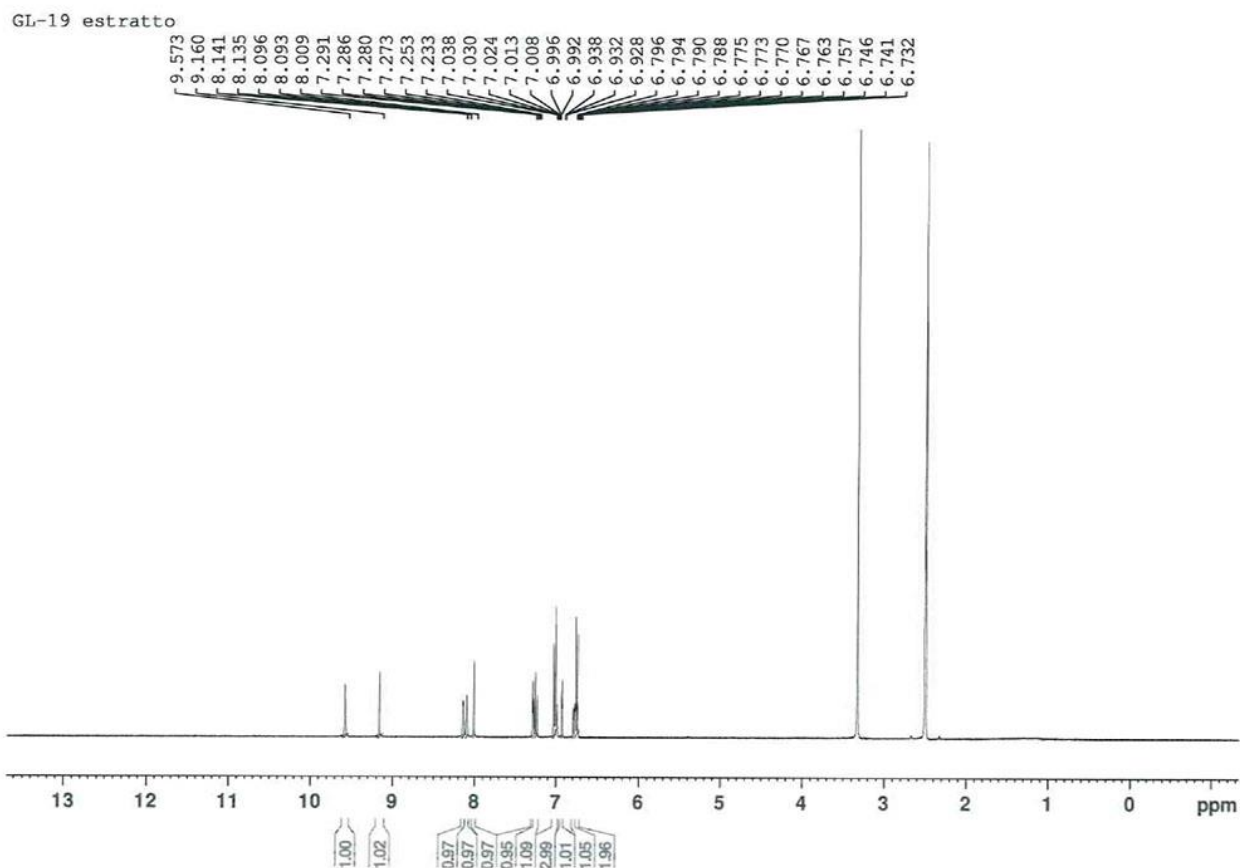

GL-19 estratto 13C

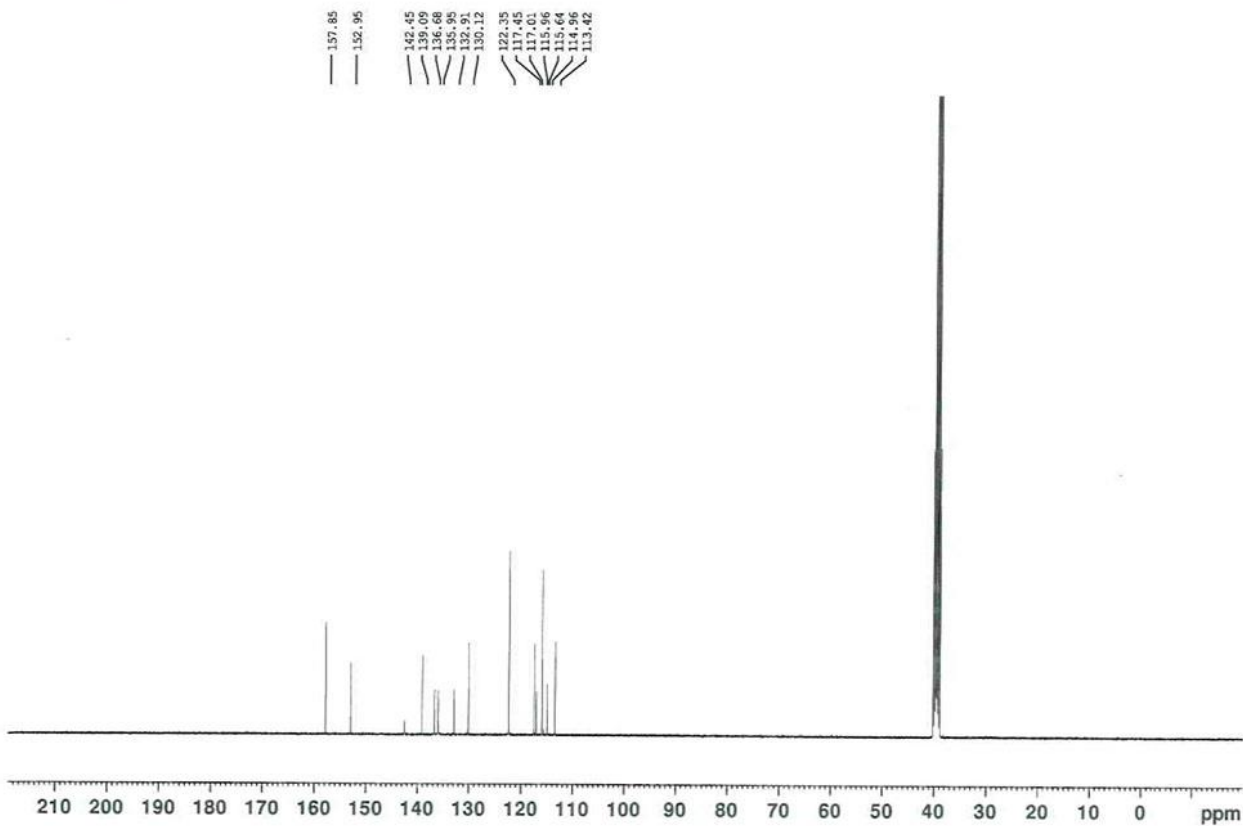

Figure S28.  $^1\text{H}$ -NMR and  $^{13}\text{C}$ -NMR of compound **19**.

GL-55

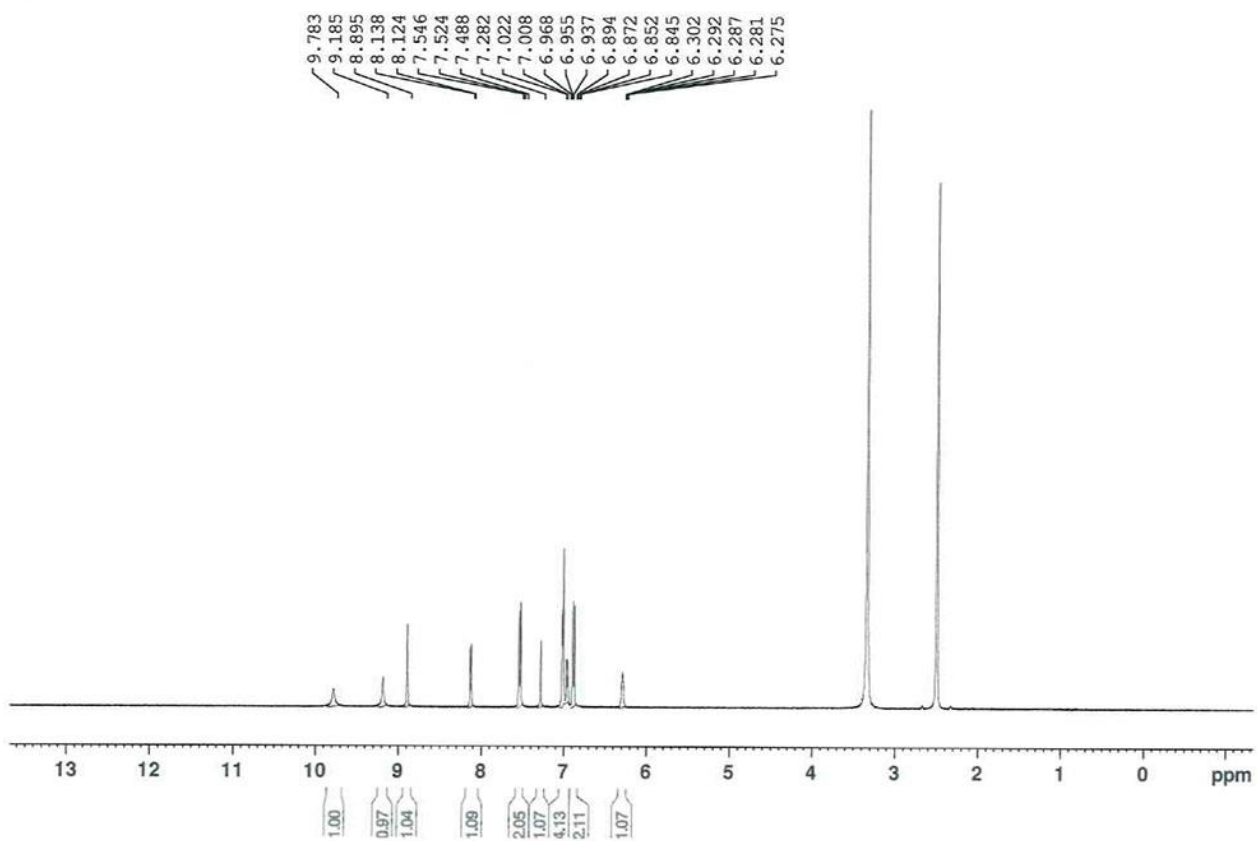

GL-55 13C

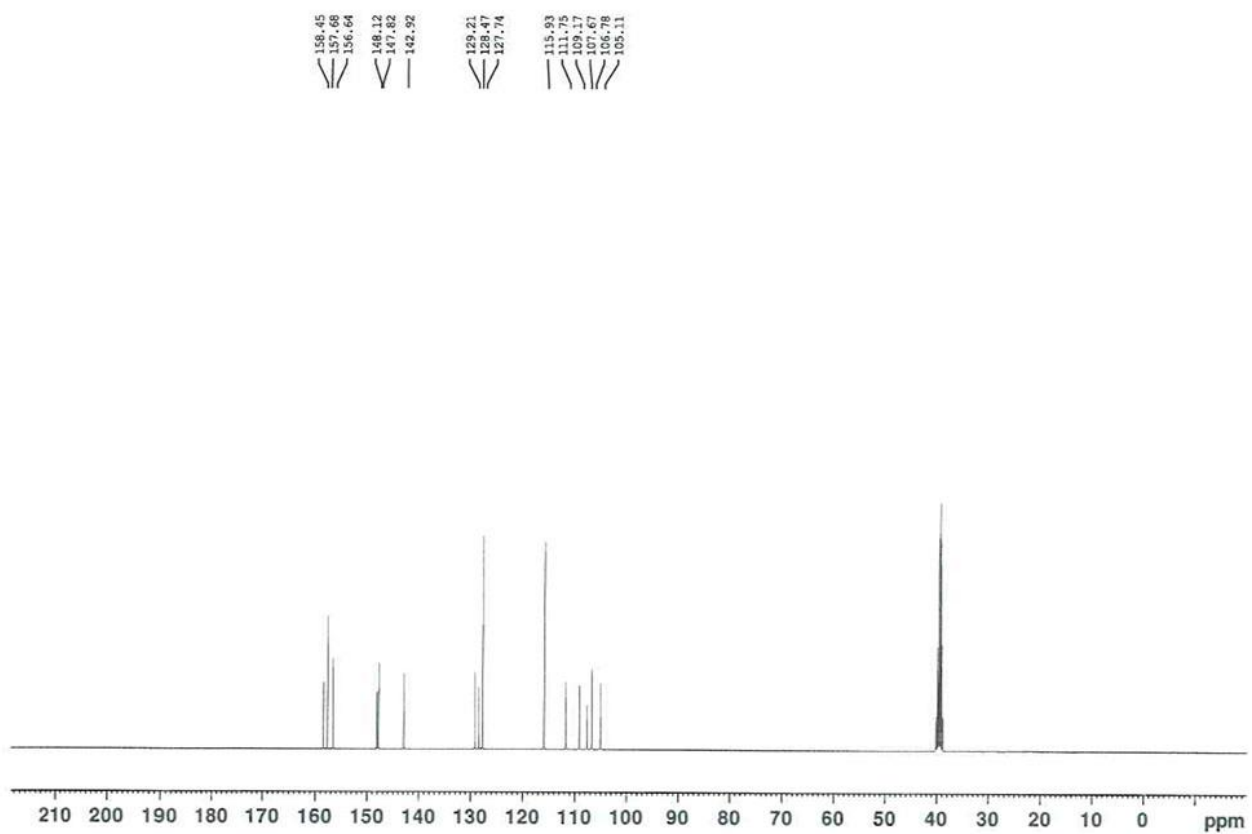

Figure S29.  $^1\text{H}$ -NMR and  $^{13}\text{C}$ -NMR of compound 20.

GL-59

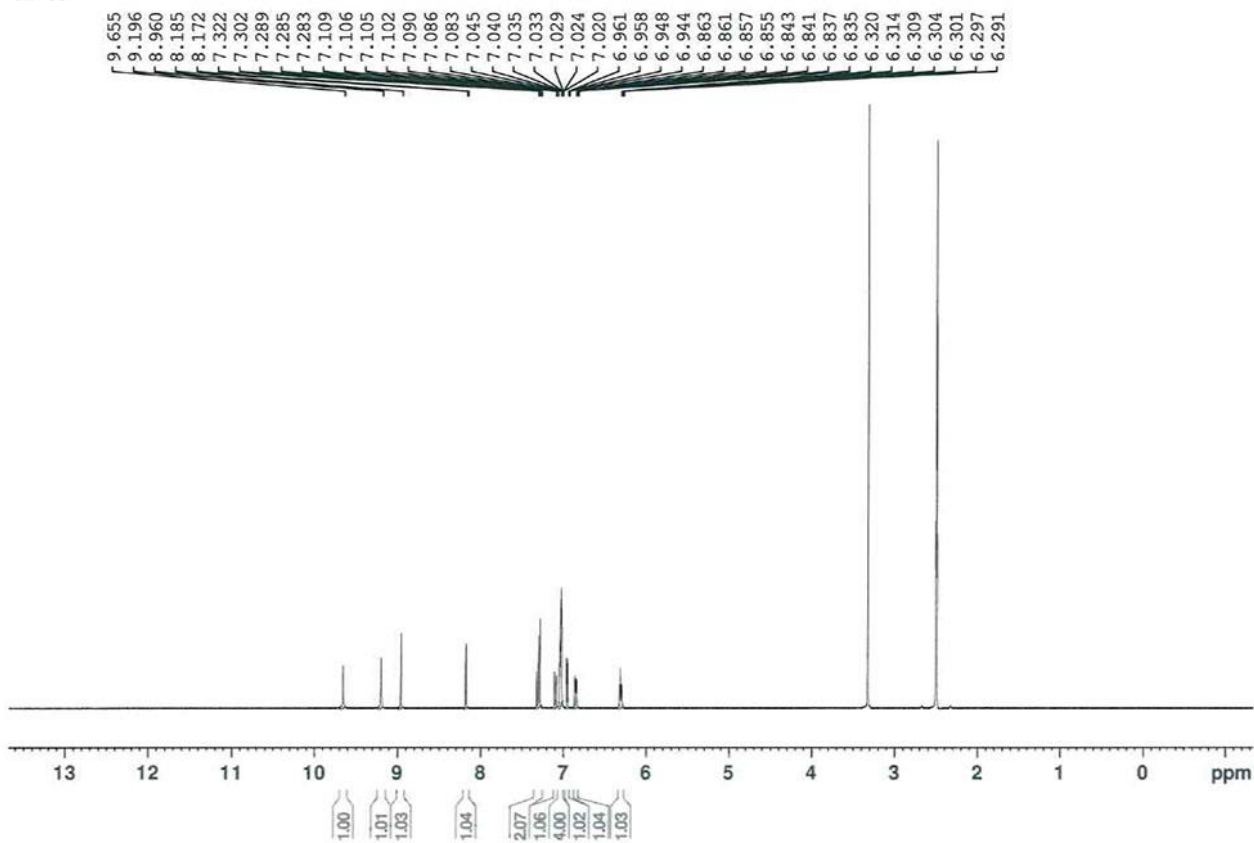

GL-59 13C

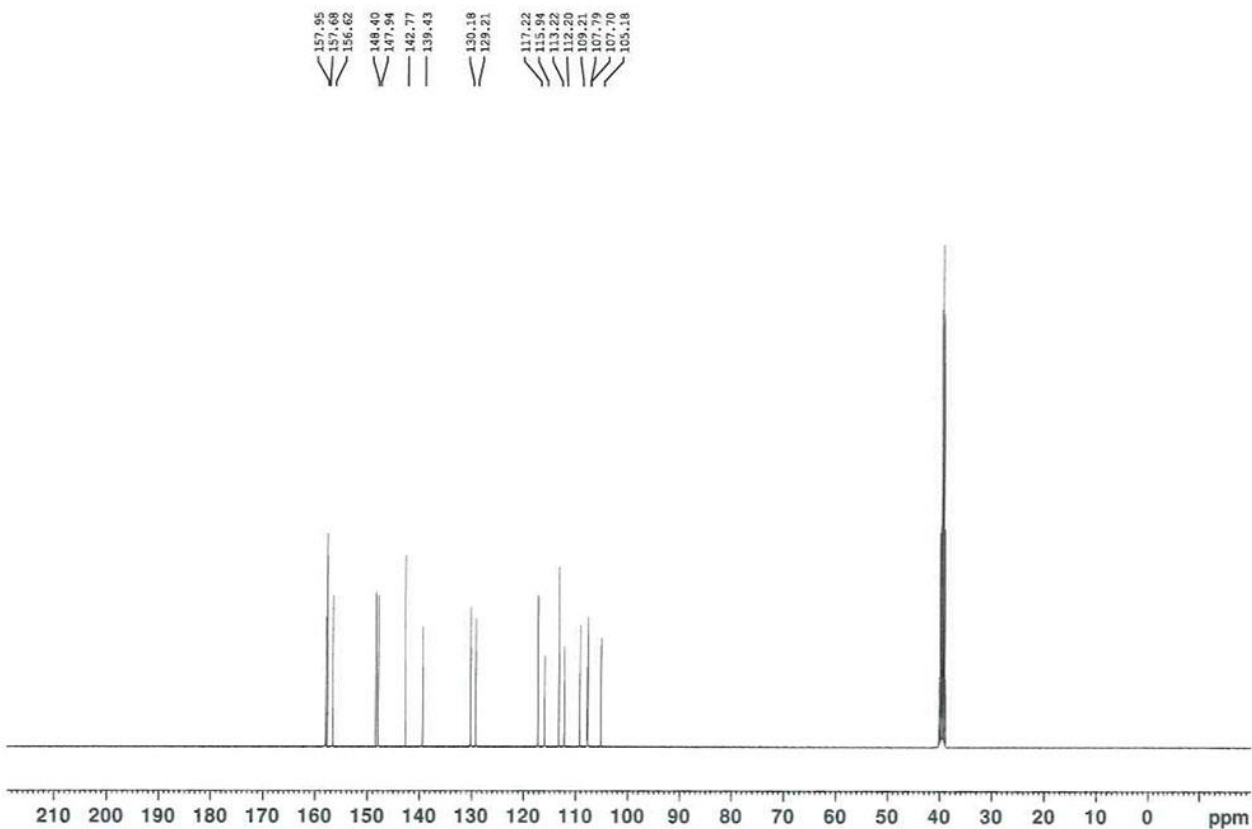

Figure S30. <sup>1</sup>H-NMR and <sup>13</sup>C-NMR of compound 21.

GL-51

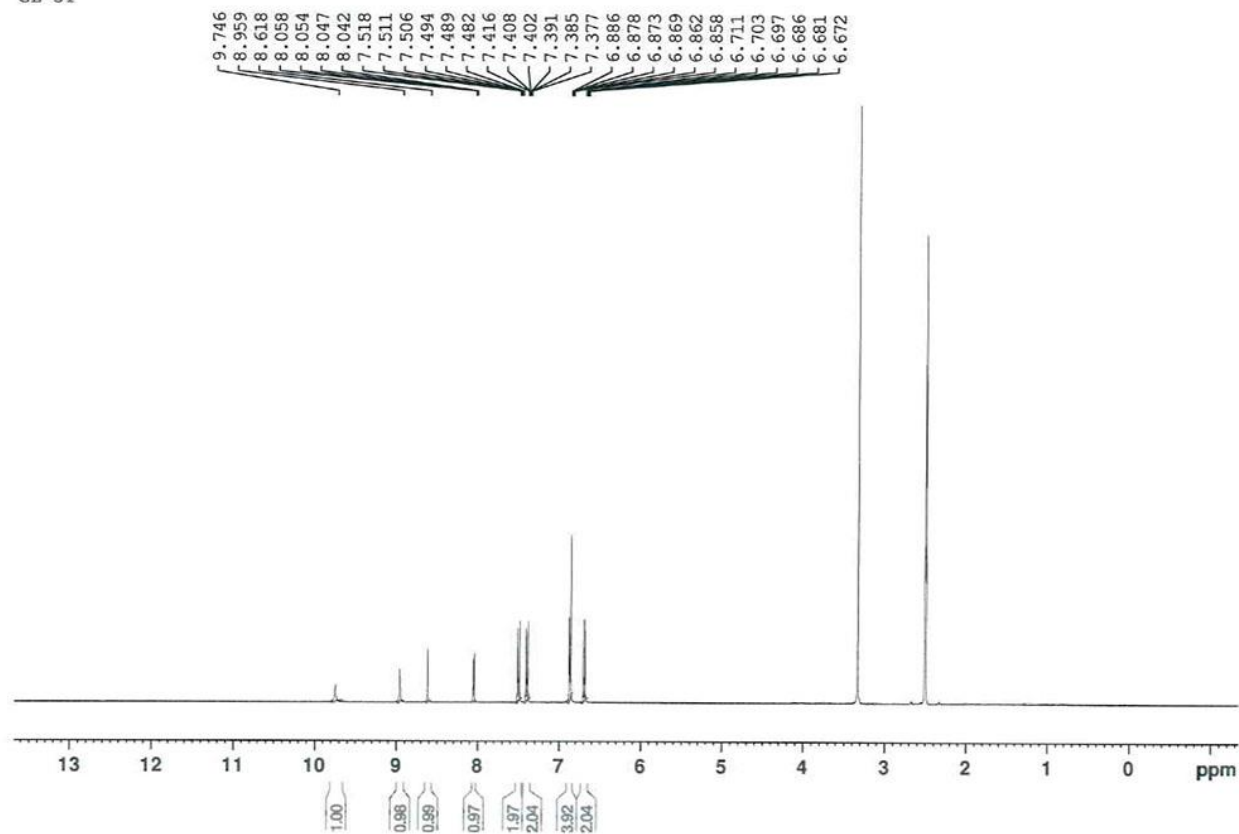

GL-51 13C

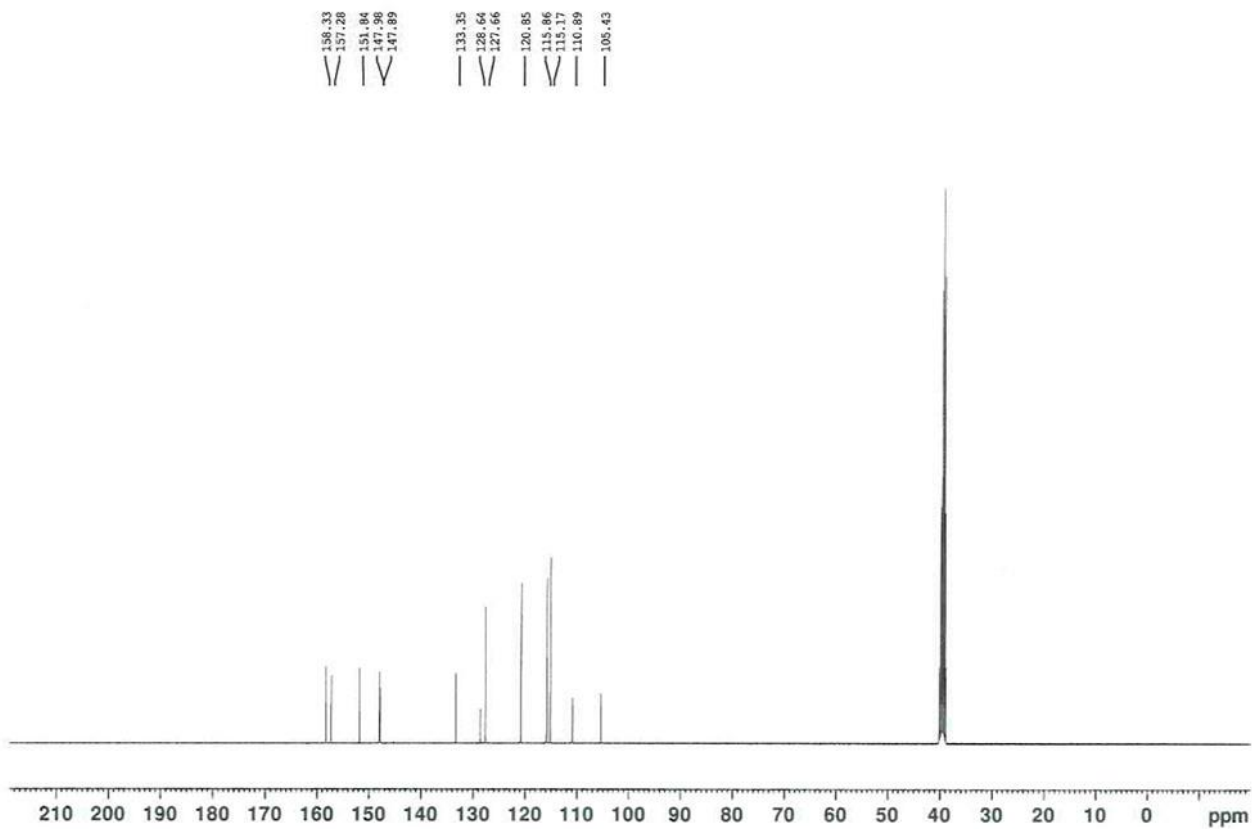

Figure S31.  $^1\text{H}$ -NMR and  $^{13}\text{C}$ -NMR of compound 22.



GL-62

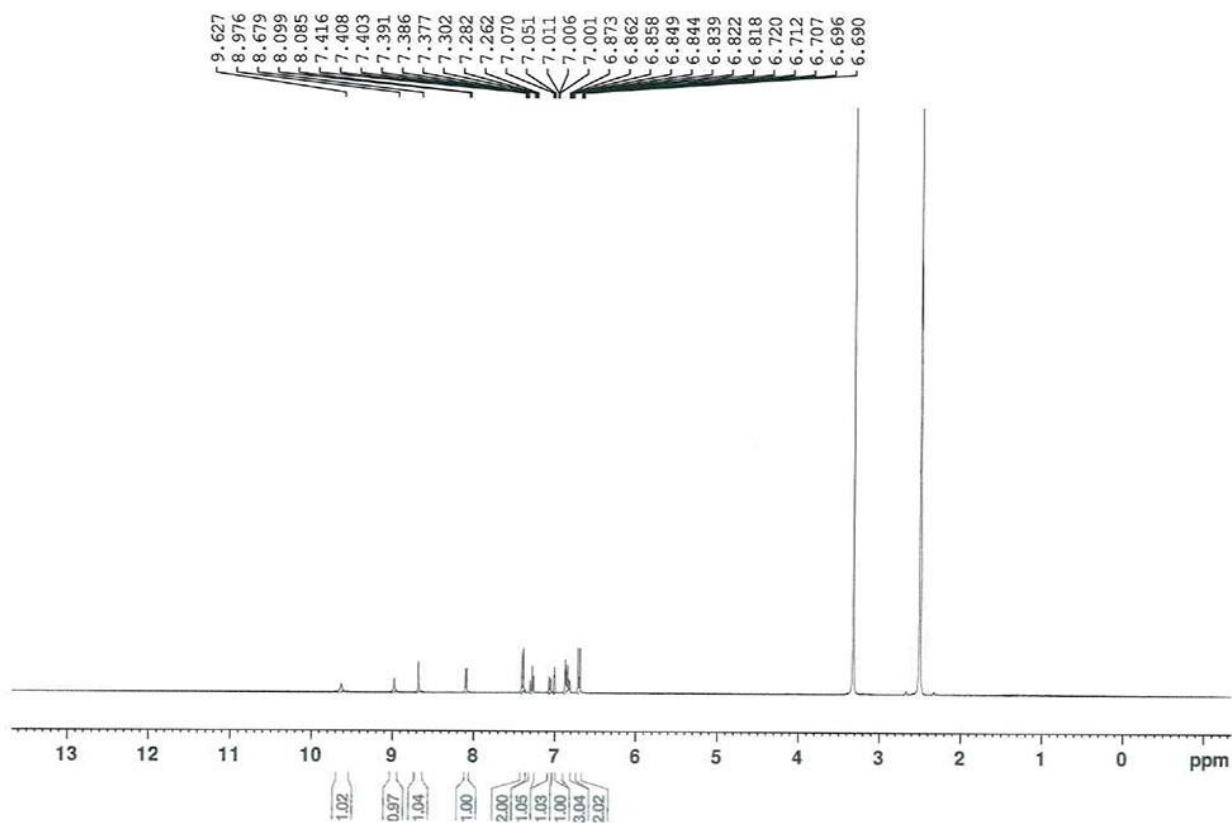

GL-62 13C

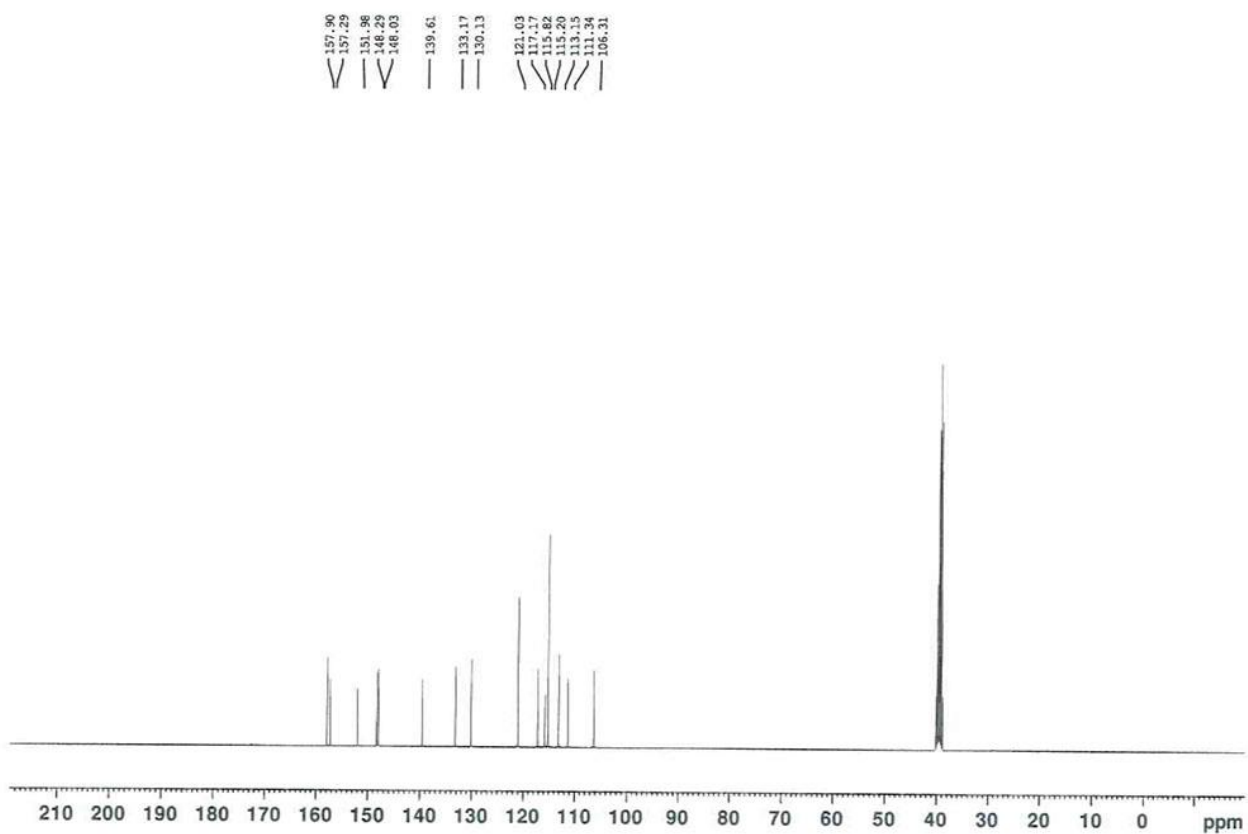

Figure S32. <sup>1</sup>H-NMR and <sup>13</sup>C-NMR of compound 23.

8 #24 RT: 0.21 AV: 1 SM: 3B NL: 4.91E9  
T: FTMS + p ESI Full ms [150.0000-1200.0000]

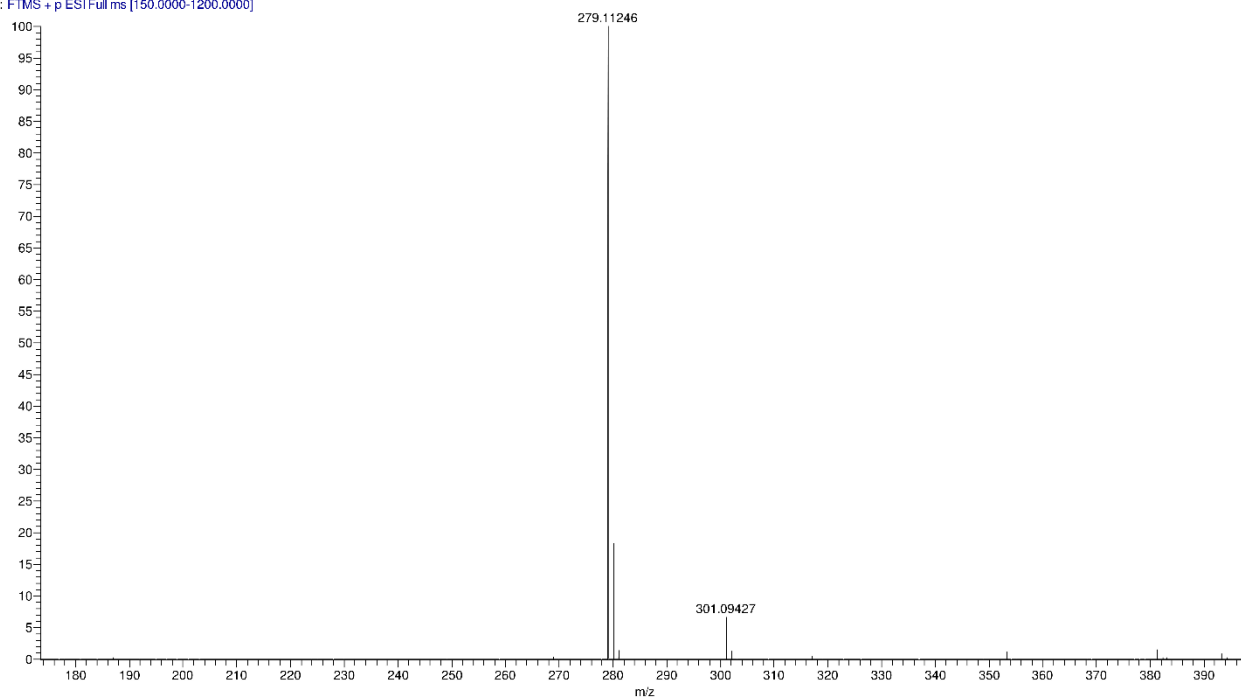

**Figure S33.** ESI-HRMS spectrum of compound **8**.

9 #6 RT: 0.05 AV: 1 SM: 3B NL: 3.84E9  
T: FTMS + p ESI Full ms [150.0000-1200.0000]

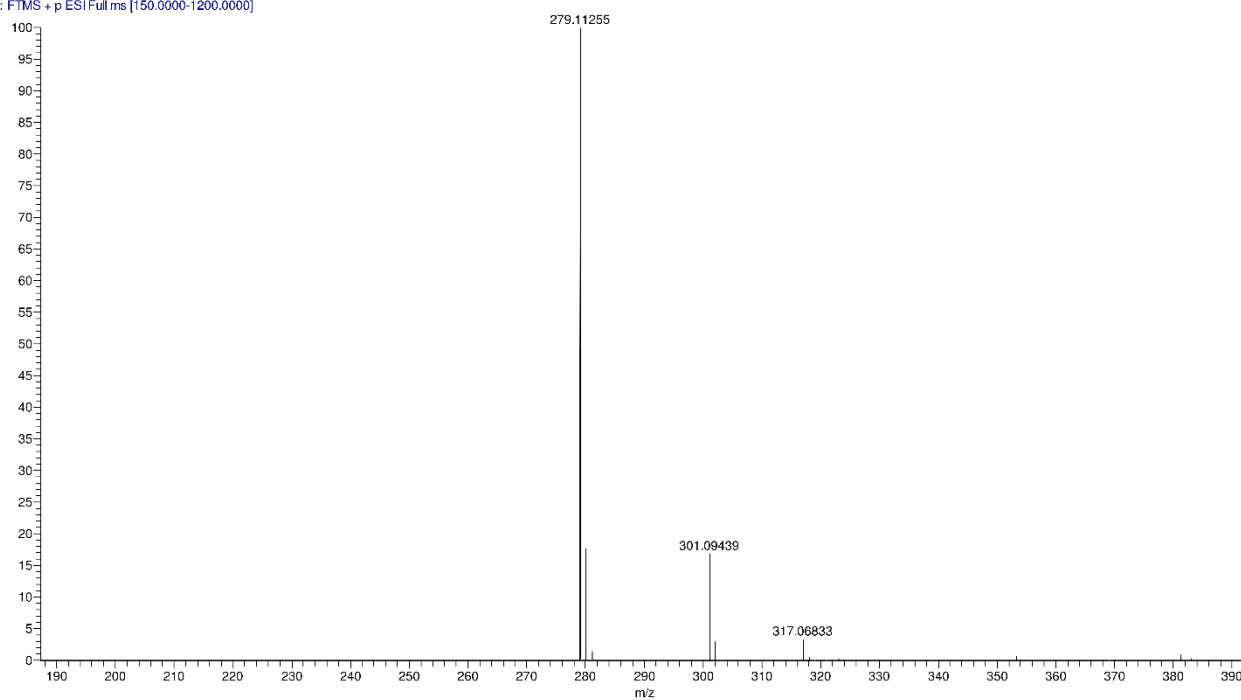

**Figure S34.** ESI-HRMS spectrum of compound **9**.

10 #11 RT: 0.09 AV: 1 SM: 3B NL: 1.20E9  
T: FTMS + p ESI Full ms [150.0000-1200.0000]

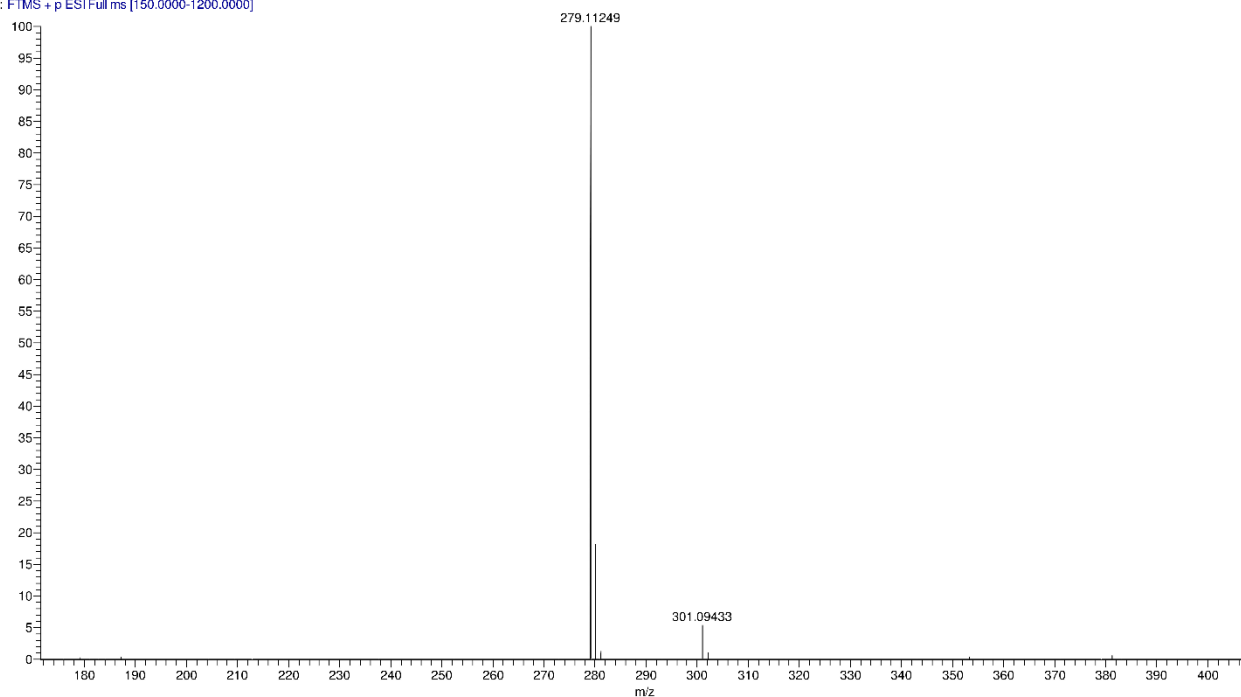

**Figure S35.** ESI-HRMS spectrum of compound 10.

11 #87 RT: 0.77 AV: 1 SM: 3B NL: 3.40E9  
T: FTMS + p ESI Full ms [150.0000-1200.0000]

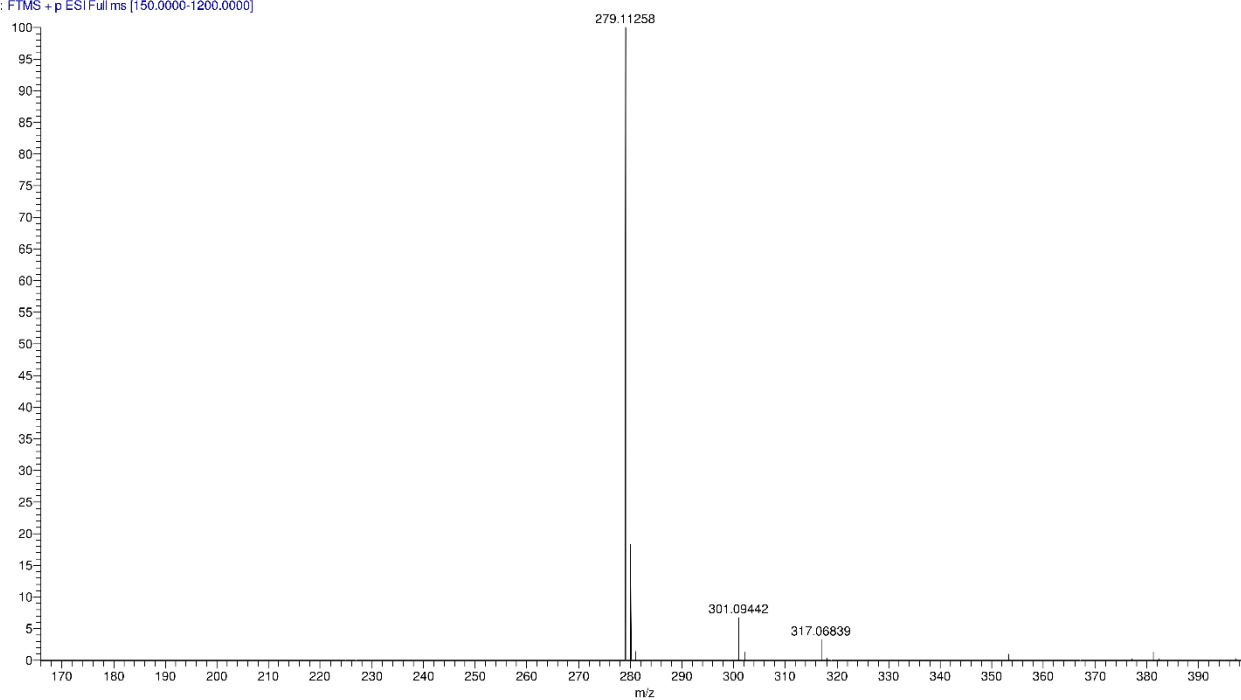

**Figure S36.** ESI-HRMS spectrum of compound 11.

12 #7 RT: 0.06 AV: 1 SM: 3B NL: 5.30E9  
T: FTMS + p ESI Full ms [150.0000-1200.0000]

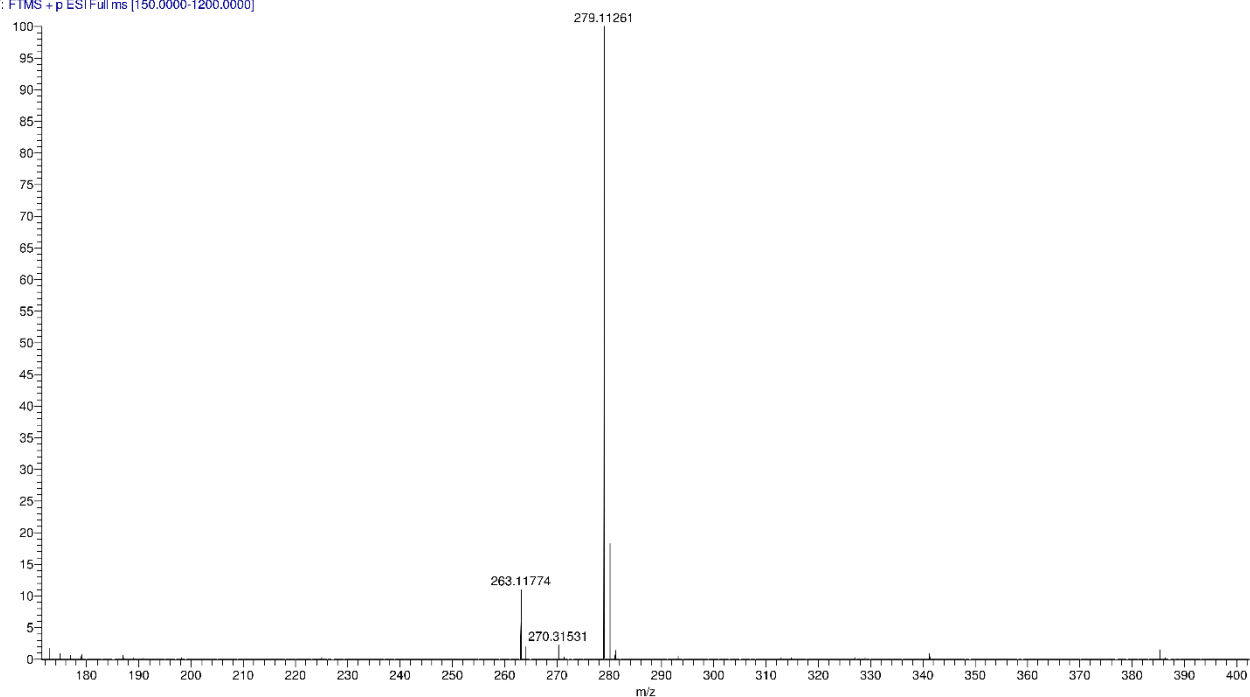

**Figure S37.** ESI-HRMS spectrum of compound 12.

13 #5 RT: 0.04 AV: 1 SM: 3B NL: 5.82E9  
T: FTMS + p ESI Full ms [150.0000-1200.0000]

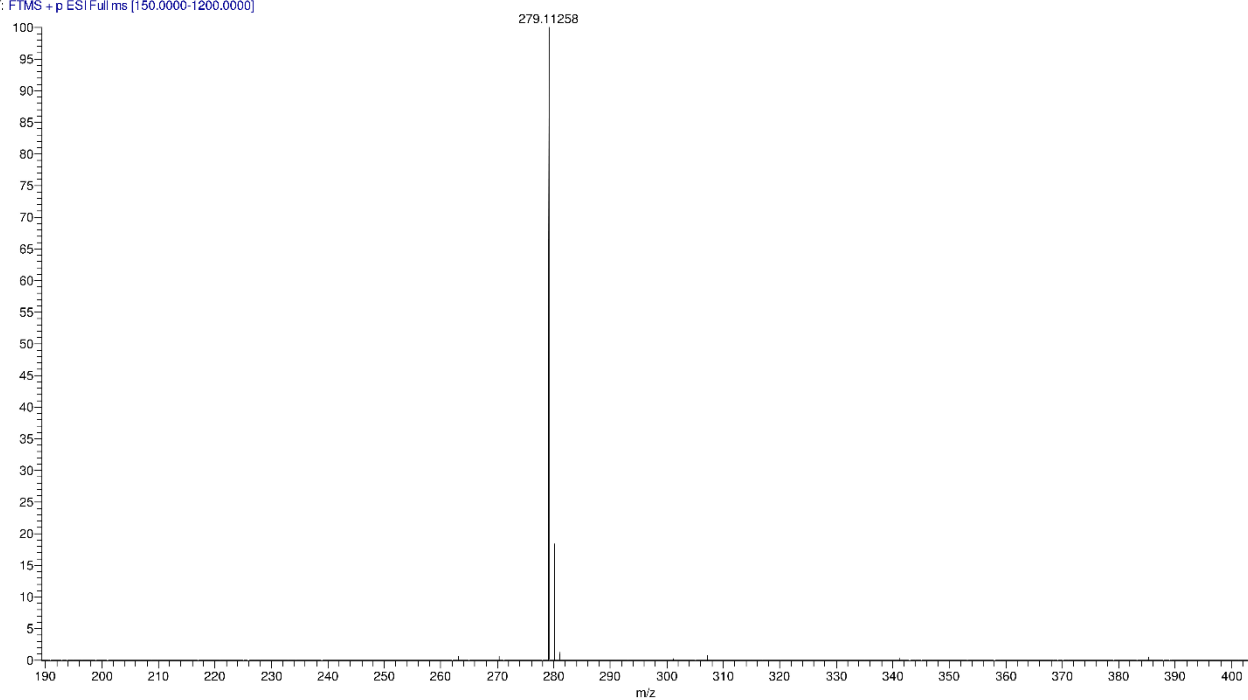

**Figure S38.** ESI-HRMS spectrum of compound 13.

14 #31 RT: 0.27 AV: 1 SM: 3B NL: 6.86E9  
T: FTMS + p ESI Full ms [150.0000-1200.0000]

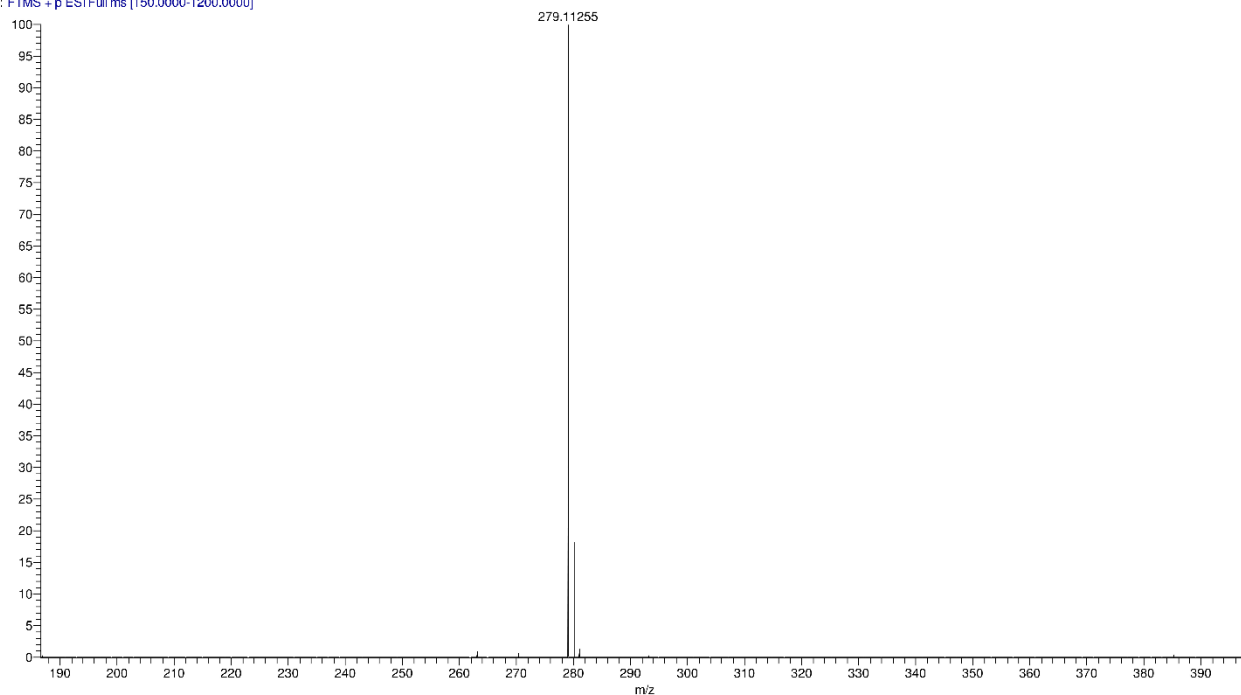

**Figure S39.** ESI-HRMS spectrum of compound 14.

15 #2 RT: 0.02 AV: 1 SM: 3B NL: 4.11E9  
T: FTMS + p ESI Full ms [150.0000-1200.0000]

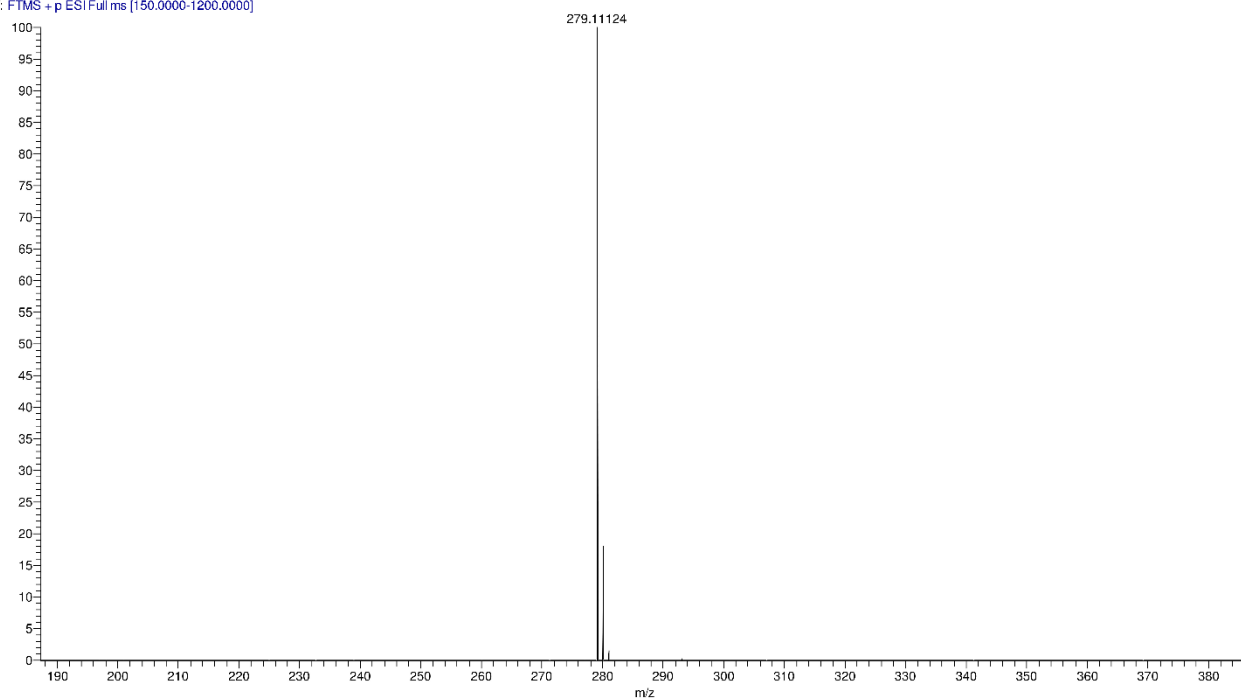

**Figure S40.** ESI-HRMS spectrum of compound 15.

16 #1 RT: 0.01 AV: 1 SM: 3B NL: 1.54E9  
T: FTMS + p ESI Full ms [150.0000-1200.0000]

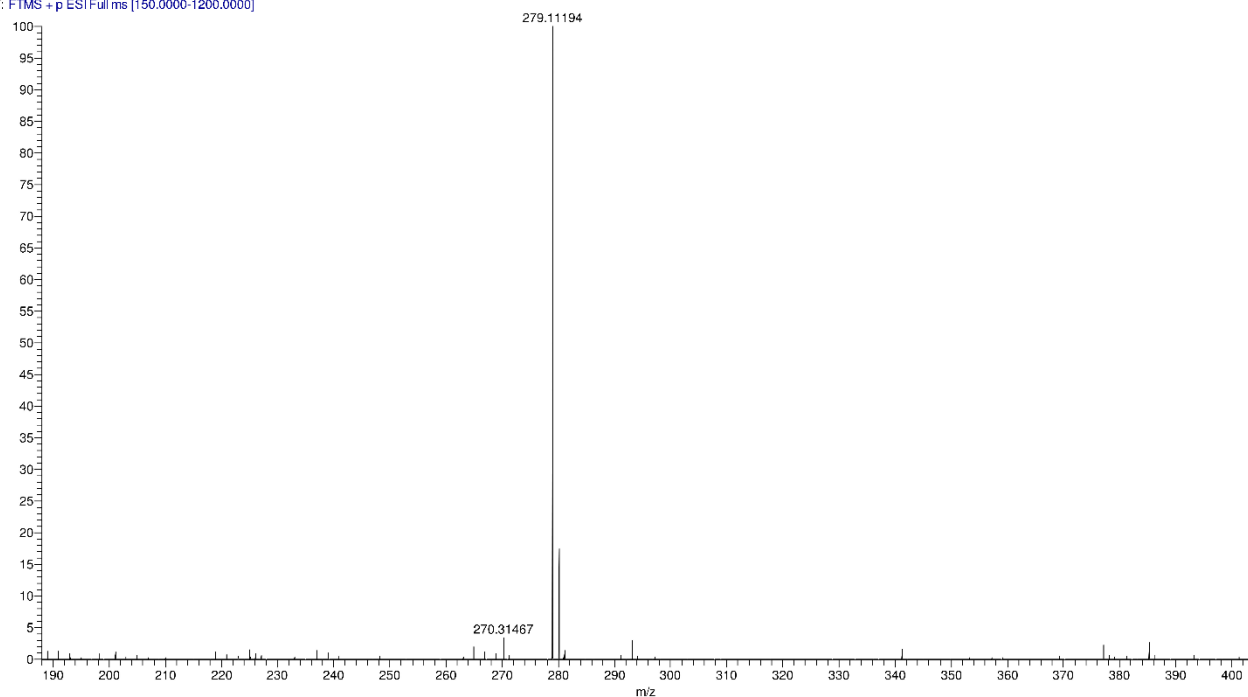

**Figure S41.** ESI-HRMS spectrum of compound 16.

17 #172 RT: 1.54 AV: 1 SM: 3B NL: 1.66E9  
T: FTMS + p ESI Full ms [150.0000-1200.0000]

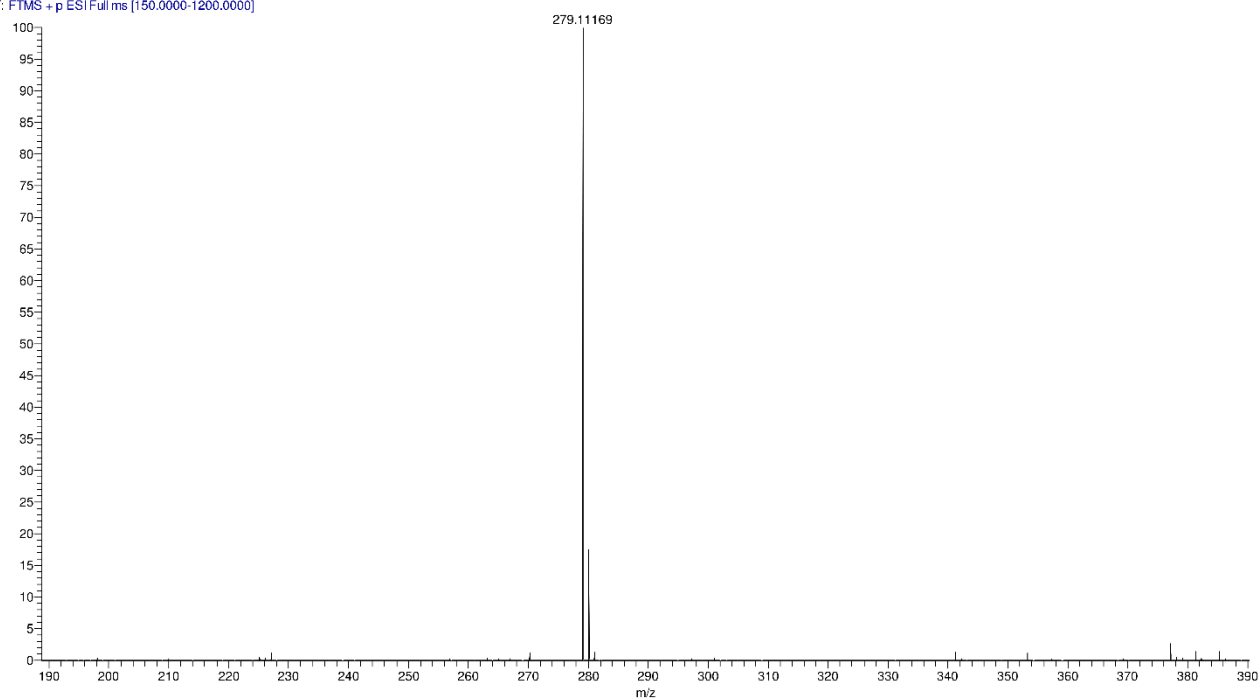

**Figure S42.** ESI-HRMS spectrum of compound 17.

18 #251 RT: 2.23 AV: 1 SM: 3B NL: 1.00E9  
T: FTMS + p ESI Full ms [150.0000-1200.0000]

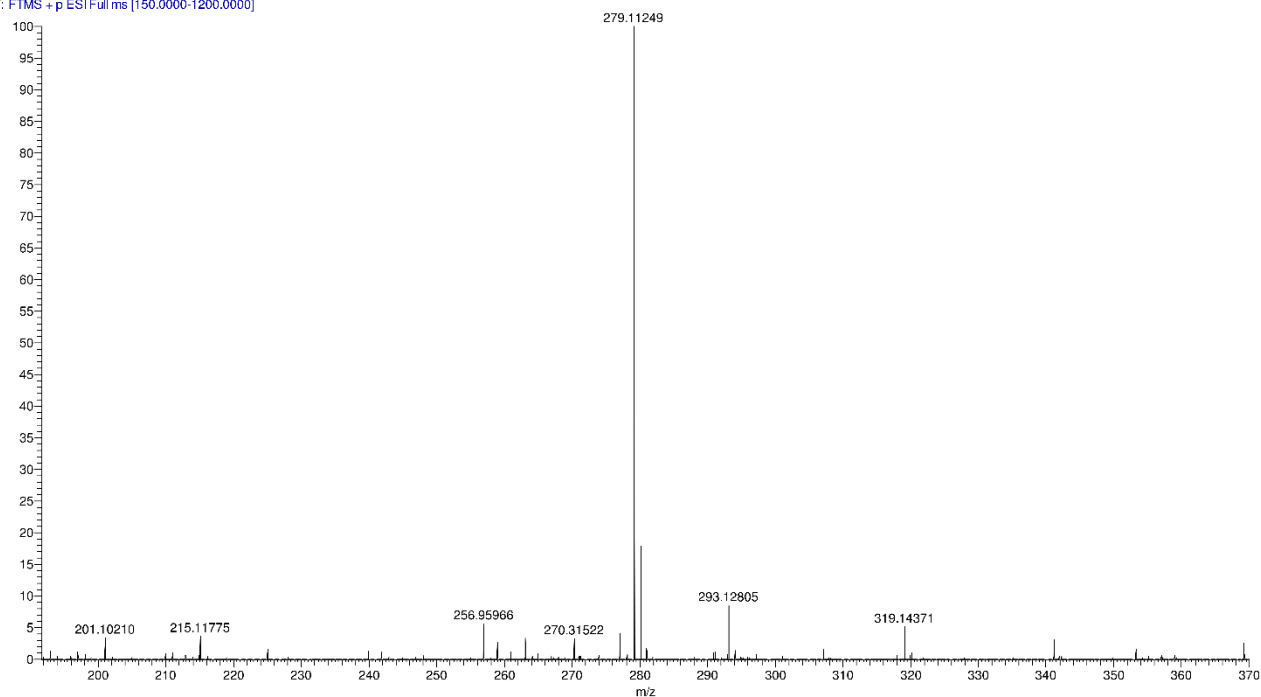

**Figure S43.** ESI-HRMS spectrum of compound 18.

19 #7 RT: 0.06 AV: 1 SM: 3B NL: 1.76E9  
T: FTMS + p ESI Full ms [150.0000-1200.0000]

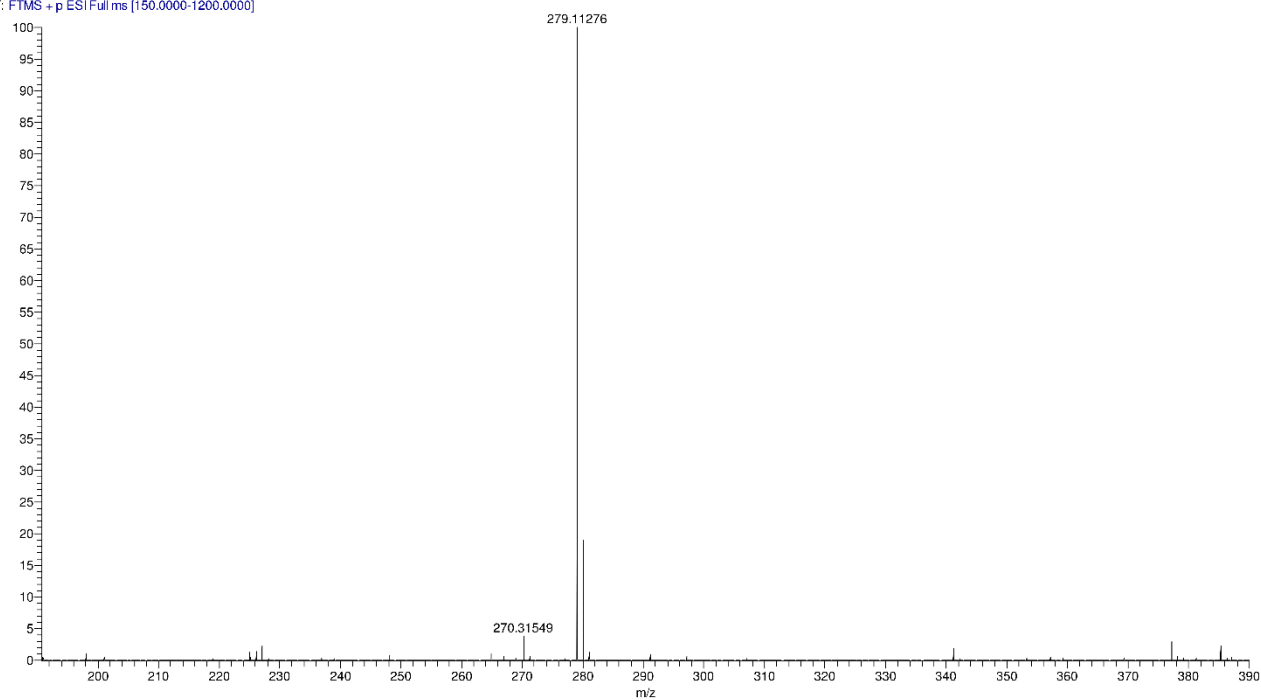

**Figure S44.** ESI-HRMS spectrum of compound 19.

20 #6 RT: 0.05 AV: 1 SM: 3B NL: 3.96E9  
T: FTMS + p ESI Full ms [150.0000-1200.0000]

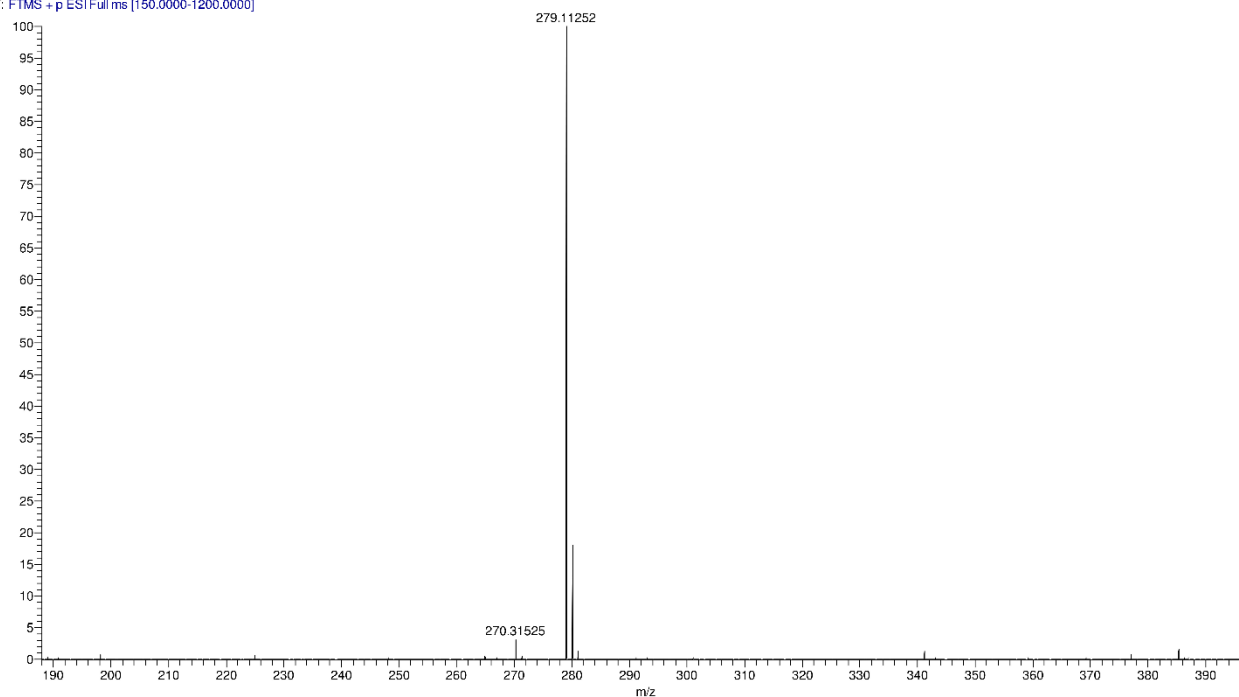

**Figure S45.** ESI-HRMS spectrum of compound **20**.

21 #5 RT: 0.04 AV: 1 SM: 3B NL: 2.16E9  
T: FTMS + p ESI Full ms [150.0000-1200.0000]

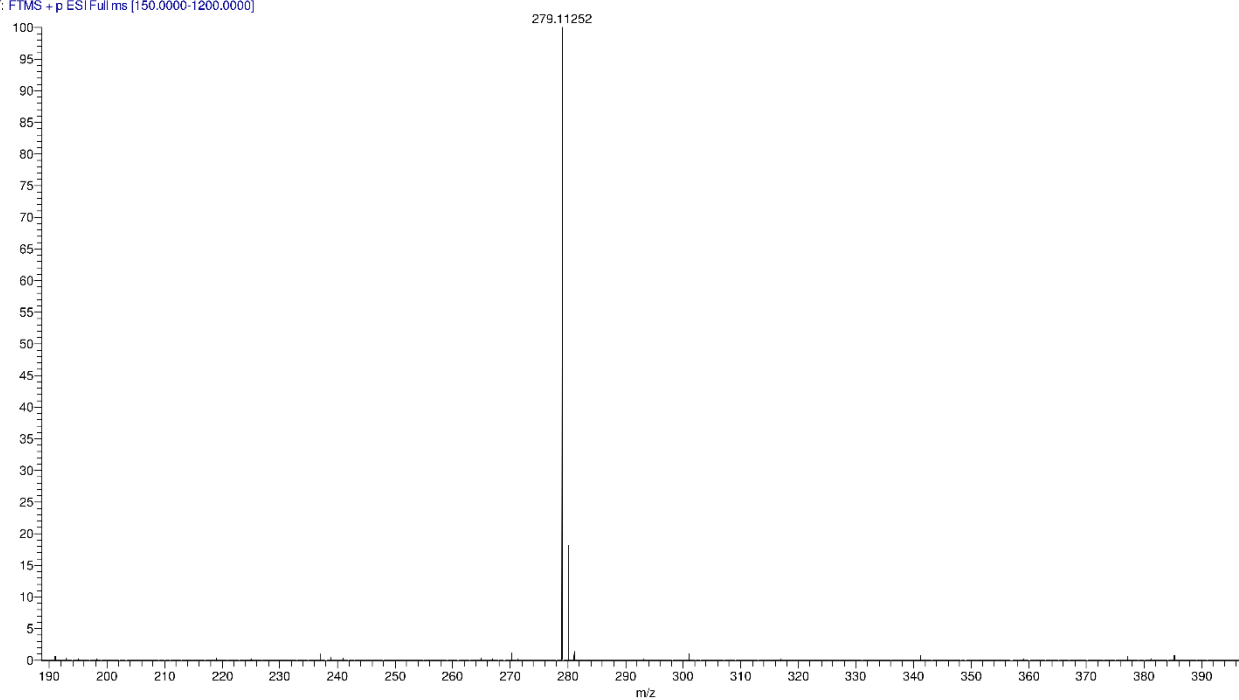

**Figure S46.** ESI-HRMS spectrum of compound **21**.



22 #11 RT: 0.09 AV: 1 SM: 3B NL: 4.53E9  
T: FTMS + p ESI Full ms [150.0000-1200.0000]

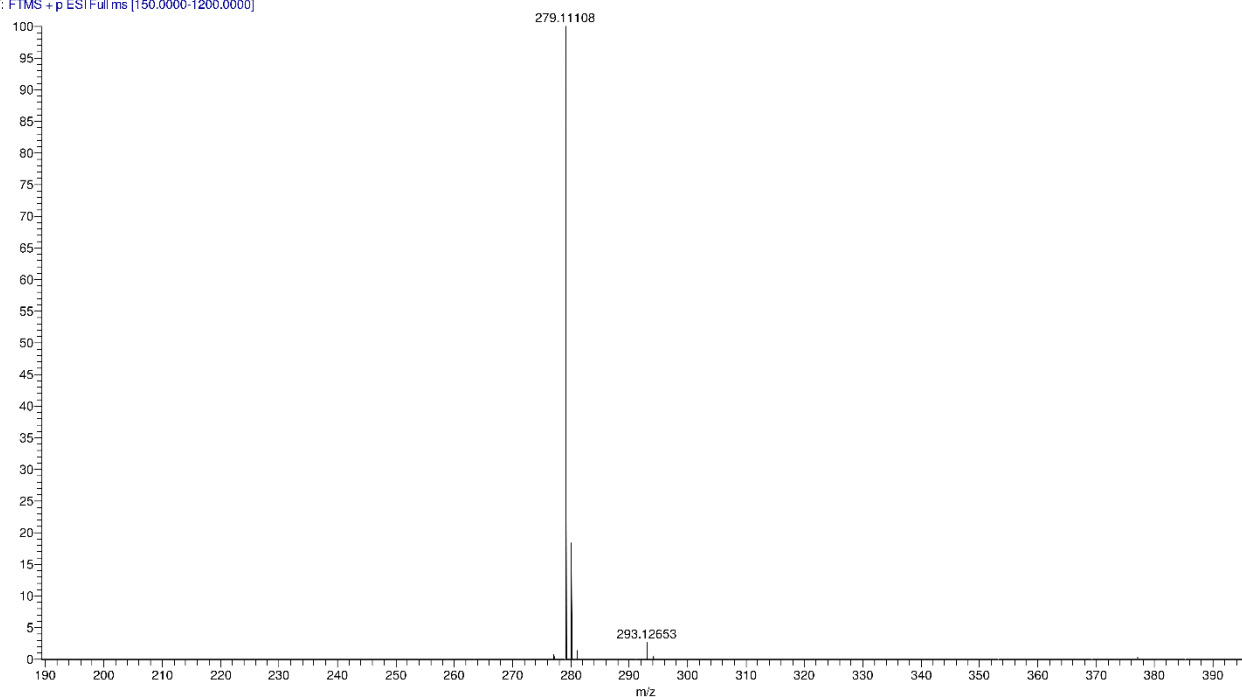

**Figure S47.** ESI-HRMS spectrum of compound **22**.

23 #147 RT: 1.32 AV: 1 SM: 3B NL: 1.55E9  
T: FTMS + p ESI Full ms [150.0000-320.0000]

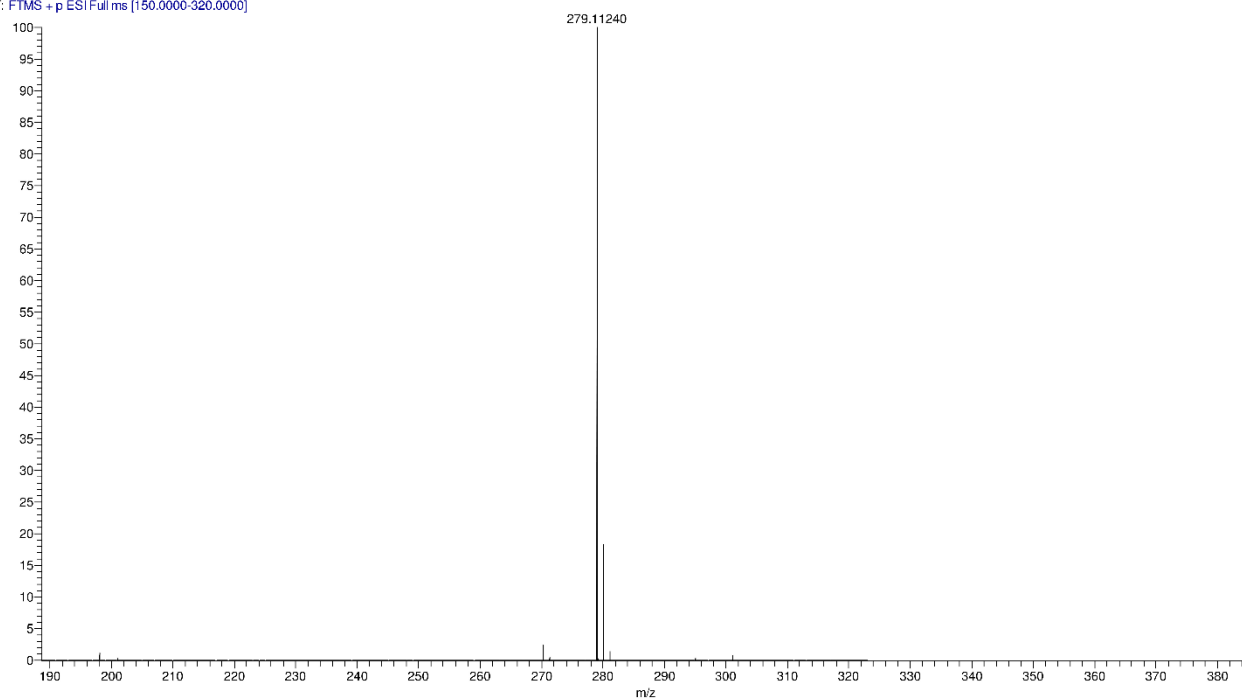

**Figure S48.** ESI-HRMS spectrum of compound **23**.

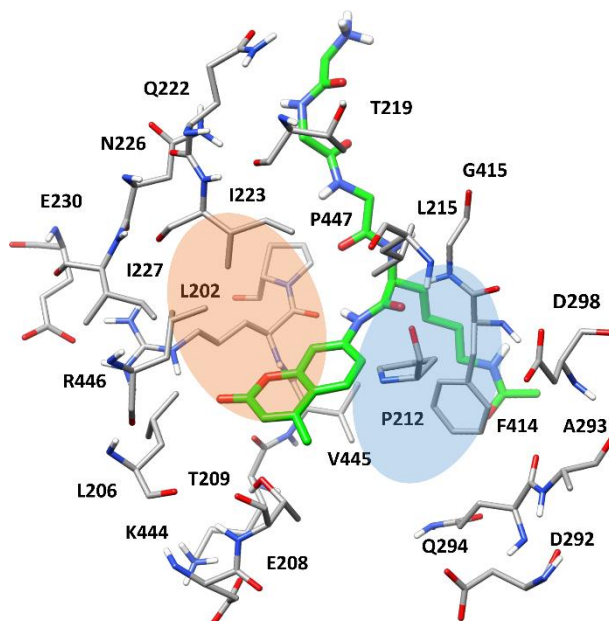

**Figure 49.** Structure of SIRT1 in complex with p53-AMC peptide (green) used for docking studies. The main portions of the two different subpockets are highlighted in orange and blue. For clarity, the side chains of R1, H2, and K3 of p53-AMC are not shown.
